# Supplementary material
Source: HighWire-hosted journal article supplement (https://bibliotheek.ehb.be/content/8/1/e000553)
Supplement: inline-supplementary-material-1 [file inline-supplementary-material-1.pdf]

## Accuracy and Comparison of Two Rapid Multiplex PCR Tests for Gastroenteritis Pathogens- a Systematic Review and Meta-analysis

<sup>¶1</sup>Li-Jun Chang MD, <sup>¶1</sup>Chun-Jen Hsiao MD, <sup>2</sup>Bing Chen MD, <sup>3</sup>Tzu-Yu Liu, MD, <sup>3</sup>Julia Ding, MD, <sup>4</sup>Wan-Ting Hsu MS, <sup>5</sup>Victor Su-Ortiz, <sup>4</sup>Szu-Ta Chen MD, MPH, PhD, <sup>9</sup>Ke-Ying Su, <sup>6,7</sup>Han-Ping Wu MD, PhD, <sup>\*9,8</sup>Chien-Chang Lee MD, ScD. National Taiwan University Hospital, Health Data Science Research Group

<sup>1</sup>Department of Medical Education, National Taiwan University Hospital, Taipei, Taiwan

<sup>2</sup>Department of Medicine, Mount Sinai Morningside and Mount Sinai West, New York, USA

<sup>3</sup>Department of Medicine, Warren Alpert Medical School of Brown University, RI, USA

<sup>4</sup>Department of Epidemiology, Harvard Chan School of Public Health, Boston, MA, USA

<sup>5</sup>Department of Medical Engineering, Cornell University, Ithaca, NY, USA

<sup>6</sup>Department of Pediatric Emergency Medicine and Medical Research, Children's Hospital, China Medical University, Taichung, Taiwan

<sup>7</sup>Department of Medicine, School of Medicine, China Medical University, Taichung, Taiwan

<sup>8</sup>Center of Intelligent Healthcare, National Taiwan University Hospital, Taipei, Taiwan

<sup>9</sup>Department of Emergency Medicine, National Taiwan University Hospital, Taipei, Taiwan

<sup>¶¶</sup>The two authors contribute equally to this work

\*Correspondence to: Chien-Chang Lee, MD, ScD

Health Data Science Research Group, Department of Emergency Medicine, National Taiwan University Hospital No.7, Chung Shan S. Rd., Zhongzheng Dist., Taipei City 100, Taiwan.

E-mail: clee100@gmail.com/ hit3transparency@gmail.com TEL: +886-2-23123456 ext. 63485

## Supplementary Materials S1-detailed search strategy

The search term combination was: (Gastroenteritis OR diarrhea OR feces OR Gastrointestinal Diseases) OR (gastrointestinal OR stool OR enteric OR feces OR faeces OR diarrhea) AND (multiplex polymerase chain reaction) OR multiplex pcr OR (multiplex pcr analysis) OR (multiplex pcr assay) OR (multiplex polymerase chain reaction assay) OR (xtag OR Luminex OR Filmarray OR biofire) OR (Faecal Pathogens B OR Faecal Panel B OR ausdiagnostics) OR (gastrointestinal pathogen panel OR gastrointestinal infection panel).

### Embase search strategy 2016-2019

|     |                                                                                                                                                                                                           |
|-----|-----------------------------------------------------------------------------------------------------------------------------------------------------------------------------------------------------------|
| #1  | 'gastroenteritis'/exp                                                                                                                                                                                     |
| #2  | 'diarrhea'/exp                                                                                                                                                                                            |
| #3  | feces*                                                                                                                                                                                                    |
| #4  | gastroenteritis*                                                                                                                                                                                          |
| #5  | 'gastrointestinal diseases*'                                                                                                                                                                              |
| #6  | gastrointestin* OR stool* OR enteric* OR 'feces'/exp OR feces OR 'faeces'/exp OR faeces OR 'diarrhea'/exp OR diarrhrea                                                                                    |
| #7  | #1 OR #2 OR #3 OR #4 OR #5 OR #6                                                                                                                                                                          |
| #8  | 'multiplex polymerase chain reaction'/exp                                                                                                                                                                 |
| #9  | xtag OR 'luminex'/exp OR luminex OR 'filmarray'/exp OR filmarray OR biofire                                                                                                                               |
| #10 | 'faecal pathogens b' OR 'faecal panel b' OR ausdiagnostics                                                                                                                                                |
| #11 | 'multiplex polymerase chain reaction'/exp OR 'multiplex pcr' OR 'multiplex pcr analysis' OR 'multiplex pcr assay' OR 'multiplex polymerase chain reaction' OR 'multiplex polymerase chain reaction assay' |
| #12 | 'gastrointestinal pathogen panel' OR 'gastrointestinal infection panel'                                                                                                                                   |
| #13 | #8 OR #9 OR #10 OR #11 OR #12                                                                                                                                                                             |
| #14 | #7 AND #13                                                                                                                                                                                                |
| #15 | #7 AND #13 AND [2016-2019]/py                                                                                                                                                                             |
|     |                                                                                                                                                                                                           |

Downloaded 927

### Web of Science search strategy: 2016-2019

|    |                                                                                                                               |
|----|-------------------------------------------------------------------------------------------------------------------------------|
| #1 | TI= (multiplex* and (PCR or polymerase chain reaction or assay* or panel* or test*)) AND TS= (gastrointestin*)                |
| #2 | TS=(“gastrointestinal pathogen panel” or “gastrointestinal infection panel”)                                                  |
| #3 | TI= (xtag or Luminex or Filmarray or biofire or “Faecal Pathogens B” or “Faecal Panel B” or ausdiagnostics) AND TS= (gastro*) |
| #4 | #3 OR #2 OR #1<br>Indexes=SCI-EXPANDED, SSCI, A&HCI<br>Timespan=All years                                                     |

|    |                |                                                         |
|----|----------------|---------------------------------------------------------|
| #5 | #3 OR #2 OR #1 | Indexes=SCI-EXPANDED, SSCI, A&HCI<br>Timespan=2016-2019 |
|----|----------------|---------------------------------------------------------|

Downloaded: 104

Pubmed search strategy: 2016-2019

((((((("Gastroenteritis"[Mesh]) OR diarrhea\*) OR feces) OR Gastroenteritis\*) OR "Gastrointestinal Diseases"[Mesh]) OR ((gastrointestin[Text Word] OR stool\*[Text Word] OR enteric\*[Text Word] OR feces[Text Word] OR faeces[Text Word] OR diarrhea[Text Word]))) AND (((("Multiplex Polymerase Chain Reaction"[Mesh]) OR ((xtag[Text Word] OR Luminex[Text Word] OR Filmarray[Text Word] OR biofire[Text Word]))) OR (("Faecal Pathogens B"[Text Word] OR "Faecal Panel B"[Text Word] OR ausdiagnostics[Text Word]))) OR "multiplex polymerase chain reaction" OR "multiplex pcr" OR "multiplex pcr analysis" OR "multiplex pcr assay" OR "multiplex polymerase chain reaction" OR "multiplex polymerase chain reaction assay") OR ((gastrointestinal pathogen panel[Text Word] OR gastrointestinal infection panel[Text Word])))) AND ("2016"[Date - Completion] : "3000"[Date - Completion])

Downloaded: 546

Ovid medline search strategy: 2016-2019

Ovid MEDLINE® and In-Process & Other Non-Indexed Citations 1946 to Present

|    |                                                                                       |
|----|---------------------------------------------------------------------------------------|
| 1  | exp Gastroenteritis/                                                                  |
| 2  | exp *Diarrhea/                                                                        |
| 3  | exp *Feces/                                                                           |
| 4  | exp *Gastroenteritis/                                                                 |
| 5  | exp *Gastrointestinal Diseases/                                                       |
| 6  | (gastrointestin* or stool* or enteric* or feces or faeces or diarrh?ea).tw.           |
| 7  | 1 or 2 or 3 or 4 or 5 or 6                                                            |
| 8  | Multiplex Polymerase Chain Reaction/                                                  |
| 9  | (xtag or Luminex or Filmarray or biofire).tw.                                         |
| 10 | ("Faecal Pathogens B" or "Faecal Panel B" or ausdiagnostics).tw.                      |
| 11 | (multiplex* adj4 (PCR or polymerase chain reaction or assay* or panel* or test*)).tw. |
| 12 | (gastrointestinal pathogen panel or gastrointestinal infection panel).tw.             |
| 13 | 13. 8 or 9 or 10 or 11 or 12                                                          |
| 14 | 14. 7 and 13                                                                          |
| 15 | limit 14 to yr="2016 - 2019"                                                          |

Downloaded: 606

## Supplementary Materials S2-Guidance notes for study assessment using tailored Quality Assessment of Diagnostic Accuracy Studies-2

Risk of bias should be judged as low for each domain only if all questions are answered with 'yes'. The risk of bias should be classed as 'high' if one or more signalling question is answered with 'no'. If at least one question is answered with 'unclear', the risk of bias should be judged 'unclear'.

|                                                                                                                                                                                                                                                                                                                                                                                                                                                                                                                                                                                                                                                                                                   |
|---------------------------------------------------------------------------------------------------------------------------------------------------------------------------------------------------------------------------------------------------------------------------------------------------------------------------------------------------------------------------------------------------------------------------------------------------------------------------------------------------------------------------------------------------------------------------------------------------------------------------------------------------------------------------------------------------|
| <b><i>Domain 1: patient selection</i></b>                                                                                                                                                                                                                                                                                                                                                                                                                                                                                                                                                                                                                                                         |
| <b><i>risk of bias</i></b>                                                                                                                                                                                                                                                                                                                                                                                                                                                                                                                                                                                                                                                                        |
| Was a consecutive or random sample of patients enrolled?                                                                                                                                                                                                                                                                                                                                                                                                                                                                                                                                                                                                                                          |
| Was a case-control design avoided?                                                                                                                                                                                                                                                                                                                                                                                                                                                                                                                                                                                                                                                                |
| Did the study avoid inappropriate exclusions?                                                                                                                                                                                                                                                                                                                                                                                                                                                                                                                                                                                                                                                     |
| Was only one sample per episode included in the study?                                                                                                                                                                                                                                                                                                                                                                                                                                                                                                                                                                                                                                            |
| <b><i>Concerns regarding applicability:</i></b> If the samples are collected from diarrhea patients, then the concerns regarding applicability should be judged as 'low'. If the study population is questionable or unconcerned, then the concerns regarding applicability should be classed as 'unclear'. If the samples are test-negative samples of conventional test, the concerns regarding applicability should be judged as 'high'. If the samples are from mixed population (such as travellers, immunocompromised patients, children aged $\leq 5$ years etc.), the concerns are low. If the samples are from travellers or immunocompromised patient only, then the concerns are high. |
| <b><i>Domain 2: index test</i></b>                                                                                                                                                                                                                                                                                                                                                                                                                                                                                                                                                                                                                                                                |
| <b><i>risk of bias</i></b>                                                                                                                                                                                                                                                                                                                                                                                                                                                                                                                                                                                                                                                                        |
| Were the index test results interpreted without knowledge of the results of the comparator and verification method?                                                                                                                                                                                                                                                                                                                                                                                                                                                                                                                                                                               |
| If a threshold was used, was it explicitly pre-specified?                                                                                                                                                                                                                                                                                                                                                                                                                                                                                                                                                                                                                                         |
| Did all samples receive the index test?                                                                                                                                                                                                                                                                                                                                                                                                                                                                                                                                                                                                                                                           |
| Was the index test undertaken as recommended by the manufacturer?                                                                                                                                                                                                                                                                                                                                                                                                                                                                                                                                                                                                                                 |
| <b><i>Concerns regarding applicability:</i></b> If the GI panel test is used according to the manufacturer's instructions, the concern of applicability of the index test is 'low'.                                                                                                                                                                                                                                                                                                                                                                                                                                                                                                               |
| <b><i>Domain 3: reference standard</i></b>                                                                                                                                                                                                                                                                                                                                                                                                                                                                                                                                                                                                                                                        |
| <b><i>risk of bias</i></b>                                                                                                                                                                                                                                                                                                                                                                                                                                                                                                                                                                                                                                                                        |
| Were the reference standard results interpreted without knowledge of the results of the index test and verification method?                                                                                                                                                                                                                                                                                                                                                                                                                                                                                                                                                                       |

|                                                                                                                                                                                                                                                                                                                                                                                                                                                                                                                                                                                                                                                                                                                                                                                                                                                                  |
|------------------------------------------------------------------------------------------------------------------------------------------------------------------------------------------------------------------------------------------------------------------------------------------------------------------------------------------------------------------------------------------------------------------------------------------------------------------------------------------------------------------------------------------------------------------------------------------------------------------------------------------------------------------------------------------------------------------------------------------------------------------------------------------------------------------------------------------------------------------|
| Is the reference standard(comparator) likely to correctly classify the target condition?                                                                                                                                                                                                                                                                                                                                                                                                                                                                                                                                                                                                                                                                                                                                                                         |
| If a threshold was used, was it explicitly pre-specified?                                                                                                                                                                                                                                                                                                                                                                                                                                                                                                                                                                                                                                                                                                                                                                                                        |
| <b>Concerns regarding applicability:</b> The question evaluated whether or not the target condition identified by the reference standard matches the target condition of interest in the review. The target condition for this assessment is the pathogen causing symptoms of diarrhea. If the reference standard detects pathogen DNA/RNA at levels that are unlikely to cause symptoms or detect dead organisms, then the applicability concern is high. Therefore, the concerns regarding applicability of the reference standard are 'high' if discrepant results were investigated with PCR-based methods and the comparator methods for at least some pathogens were conventional non-PCR microbiology tests. Furthermore, PCR and sequencing are not common daily practice due to their higher price, then the concerns regarding applicability are high. |
|                                                                                                                                                                                                                                                                                                                                                                                                                                                                                                                                                                                                                                                                                                                                                                                                                                                                  |
| <b>Domain 4: flow and timing</b>                                                                                                                                                                                                                                                                                                                                                                                                                                                                                                                                                                                                                                                                                                                                                                                                                                 |
| <b>risk of bias</b>                                                                                                                                                                                                                                                                                                                                                                                                                                                                                                                                                                                                                                                                                                                                                                                                                                              |
| Was there an appropriate interval between index test(s) and reference standard?                                                                                                                                                                                                                                                                                                                                                                                                                                                                                                                                                                                                                                                                                                                                                                                  |
| Did all discordant samples receive a reference standard?                                                                                                                                                                                                                                                                                                                                                                                                                                                                                                                                                                                                                                                                                                                                                                                                         |
| Did all patients receive the same reference standard?                                                                                                                                                                                                                                                                                                                                                                                                                                                                                                                                                                                                                                                                                                                                                                                                            |
| Did all samples receive the comparator methods for all pathogens considered in the study?                                                                                                                                                                                                                                                                                                                                                                                                                                                                                                                                                                                                                                                                                                                                                                        |
| Were all patients included in the analysis?                                                                                                                                                                                                                                                                                                                                                                                                                                                                                                                                                                                                                                                                                                                                                                                                                      |

**Supplementary Materials S3-** Characteristics of the 11 included studies (21 data sets)

| Characteristic                                                                                                                      | n (data sets) (%) |
|-------------------------------------------------------------------------------------------------------------------------------------|-------------------|
| <b>Age</b>                                                                                                                          |                   |
| Children                                                                                                                            | 2 (10%)           |
| Adult                                                                                                                               | 1 (5%)            |
| Mixed                                                                                                                               | 12(56%)           |
| Unclear                                                                                                                             | 6 (29%)           |
| <b>Index test</b>                                                                                                                   |                   |
| Luminex xTAG GI panel                                                                                                               | 15(71%)           |
| FilmArray GI panel                                                                                                                  | 6 (29%)           |
| <b>Reference standard</b>                                                                                                           |                   |
| Sequencing or real-time PCR                                                                                                         | 6 (29%)           |
| Conventional standard microbiology techniques (including culture, C. difficile toxin study, enzyme immunoassay (EIA) or microscopy) | 6 (29%)           |
| Mixed (including PCR and conventional standard microbiology techniques)                                                             | 9 (42%)           |
| <b>Specimen type</b>                                                                                                                |                   |
| Stool                                                                                                                               | 21(100%)          |
| <b>Study design</b>                                                                                                                 |                   |
| Prospective                                                                                                                         | 15(71%)           |
| Retrospective                                                                                                                       | 4 (19%)           |
| mixed                                                                                                                               | 2 (10%)           |
| <b>Country</b>                                                                                                                      |                   |
| United States                                                                                                                       | 9 (42%)           |

|                |         |
|----------------|---------|
| Netherlands    | 5 (23%) |
| Spain          | 2 (10%) |
| Vietnam        | 2 (10%) |
| United Kingdom | 1 (5%)  |
| France         | 1 (5%)  |
| China          | 1 (5%)  |

**Supplementary Materials S4-** Comparison of characteristics between two FDA-approved multiplex platforms for the detection of gastrointestinal pathogens. (10)

| Feature                            | Luminex                                                                                                                                                                                                                                                                                                                                                                                                                                                                                                                                                                                                                                                                                                                                                                                                                                                                                                                | FilmArray                                                                                                                                                                                                                                                                                                                                                                                                                                                                                                                                                                                                                                                                                                                                                                                                                                                                                                                                       |
|------------------------------------|------------------------------------------------------------------------------------------------------------------------------------------------------------------------------------------------------------------------------------------------------------------------------------------------------------------------------------------------------------------------------------------------------------------------------------------------------------------------------------------------------------------------------------------------------------------------------------------------------------------------------------------------------------------------------------------------------------------------------------------------------------------------------------------------------------------------------------------------------------------------------------------------------------------------|-------------------------------------------------------------------------------------------------------------------------------------------------------------------------------------------------------------------------------------------------------------------------------------------------------------------------------------------------------------------------------------------------------------------------------------------------------------------------------------------------------------------------------------------------------------------------------------------------------------------------------------------------------------------------------------------------------------------------------------------------------------------------------------------------------------------------------------------------------------------------------------------------------------------------------------------------|
| Technology                         | PCR plus xTAG (fluorescent bead-based detection)                                                                                                                                                                                                                                                                                                                                                                                                                                                                                                                                                                                                                                                                                                                                                                                                                                                                       | Nested PCR plus melting curve                                                                                                                                                                                                                                                                                                                                                                                                                                                                                                                                                                                                                                                                                                                                                                                                                                                                                                                   |
| Processing time per run (min)      | 45                                                                                                                                                                                                                                                                                                                                                                                                                                                                                                                                                                                                                                                                                                                                                                                                                                                                                                                     | 2                                                                                                                                                                                                                                                                                                                                                                                                                                                                                                                                                                                                                                                                                                                                                                                                                                                                                                                                               |
| Separate extraction required (min) | Yes (~45)                                                                                                                                                                                                                                                                                                                                                                                                                                                                                                                                                                                                                                                                                                                                                                                                                                                                                                              | No                                                                                                                                                                                                                                                                                                                                                                                                                                                                                                                                                                                                                                                                                                                                                                                                                                                                                                                                              |
| Time/run (h)                       | ~3.5                                                                                                                                                                                                                                                                                                                                                                                                                                                                                                                                                                                                                                                                                                                                                                                                                                                                                                                   | ~1                                                                                                                                                                                                                                                                                                                                                                                                                                                                                                                                                                                                                                                                                                                                                                                                                                                                                                                                              |
| Throughput (no. specimens/run)     | 96                                                                                                                                                                                                                                                                                                                                                                                                                                                                                                                                                                                                                                                                                                                                                                                                                                                                                                                     | 1                                                                                                                                                                                                                                                                                                                                                                                                                                                                                                                                                                                                                                                                                                                                                                                                                                                                                                                                               |
| Maximum no. of targets             | 15                                                                                                                                                                                                                                                                                                                                                                                                                                                                                                                                                                                                                                                                                                                                                                                                                                                                                                                     | 22                                                                                                                                                                                                                                                                                                                                                                                                                                                                                                                                                                                                                                                                                                                                                                                                                                                                                                                                              |
| targets                            | <ul style="list-style-type: none"> <li>● <i>Campylobacter</i> (<i>C. jejuni</i>, <i>C. coli</i>和<i>C. lari</i>)</li> <li>● <i>Clostridium difficile</i> (<i>C. difficile</i>) toxin A/B</li> <li>● <i>Escherichia coli</i> (<i>E. coli</i>) O157</li> <li>● Enterotoxigenic <i>Escherichia coli</i> (ETEC) LT/ST</li> <li>● <i>Salmonella</i></li> <li>● Shiga-like Toxin producing <i>E. coli</i> (STEC) stx 1/stx 2</li> <li>● <i>Shigella</i> (including <i>S. boydii</i>, <i>S. sonnei</i>, <i>S. flexneri</i> and <i>S. dysenteriae</i>)</li> <li>● <i>Vibrio cholerae</i> (<i>V. cholerae</i>) cholera toxin gene (ctx)</li> <li>● <i>Yersinia enterocolitica</i></li> <li>● Adenovirus 40/41</li> <li>● Norovirus GI/GII</li> <li>● Rotavirus A</li> <li>● <i>Cryptosporidium</i> (<i>C. parvum</i> and <i>C. hominis</i>)</li> <li>● <i>Entamoeba histolytica</i></li> <li>● <i>Giardia lamblia</i></li> </ul> | <ul style="list-style-type: none"> <li>● <i>Campylobacter</i> (<i>C. jejuni</i>/<i>C. coli</i>/<i>C. upsaliensis</i>)</li> <li>● <i>Clostridium difficile</i> (<i>C. difficile</i>) toxin A/B</li> <li>● <i>Plesiomonas shigelloides</i></li> <li>● <i>Salmonella</i></li> <li>● <i>Vibrio</i> (<i>V. parahaemolyticus</i>/<i>V. vulnificus</i>/ <i>V. cholerae</i>)</li> <li>● <i>Vibrio cholerae</i></li> <li>● <i>Yersinia enterocolitica</i></li> <li>● Enterohaggative <i>Escherichia coli</i> (EAEC)</li> <li>● Enteropathogenic <i>Escherichia coli</i> (EPEC)</li> <li>● Enterotoxigenic <i>Escherichia coli</i> (ETEC) lt/st</li> <li>● Shiga-like toxin-producing <i>Escherichia coli</i> (STEC) stx1/stx2</li> <li>● <i>E. coli</i> O157</li> <li>● <i>Shigella</i>/ Enteroinvasive <i>Escherichia coli</i> (EIEC)</li> <li>● Adenovirus F 40/41</li> <li>● Astrovirus</li> <li>● Norovirus GI/GII</li> <li>● Rotavirus A</li> </ul> |



| Feature                                   | Luminex     | FilmArray                                                                                                                                                                                                                                        |
|-------------------------------------------|-------------|--------------------------------------------------------------------------------------------------------------------------------------------------------------------------------------------------------------------------------------------------|
|                                           |             | <ul style="list-style-type: none"> <li>● Sapovirus (Genogroups I, II, IV and V)</li> <li>● <i>Cryptosporidium</i></li> <li>● <i>Cyclospora cayetanensis</i></li> <li>● <i>Entamoeba histolytica</i></li> <li>● <i>Giardia lamblia</i></li> </ul> |
| Open or closed system                     | Open        | Closed                                                                                                                                                                                                                                           |
| Results                                   | Qualitative | Qualitative                                                                                                                                                                                                                                      |
| Footprint size                            | Moderate    | Small                                                                                                                                                                                                                                            |
| List price per instrument (\$)            | 37,000      | 39,500                                                                                                                                                                                                                                           |
| List price reagent cost per specimen (\$) | 80–90       | 155                                                                                                                                                                                                                                              |

**Supplementary Materials S5**-detailed characteristics of 11 included studies

| I<br>D | Author, year,<br>country          | Number and<br>characteristics of<br>samples and patient                                                                                                                         | Patient age                                                                             | Patient<br>inclusion<br>criteria | Specimen<br>type | Routine testing<br>methods                                                                                                                                                                                                                               | Adjudication<br>methods for<br>discordant<br>results | Index test<br>(multiplex<br>PCR) | <i>pathogens</i>                   | Sen  | Spe  |
|--------|-----------------------------------|---------------------------------------------------------------------------------------------------------------------------------------------------------------------------------|-----------------------------------------------------------------------------------------|----------------------------------|------------------|----------------------------------------------------------------------------------------------------------------------------------------------------------------------------------------------------------------------------------------------------------|------------------------------------------------------|----------------------------------|------------------------------------|------|------|
| 1      | Deng J et al.,<br>2015, China     | Prospective, 290<br>stool samples from<br>290 patient. 70<br>inpatients and 220<br>outpatients, and<br>pediatric outpatients<br>were the most<br>common (54.1%).<br>64.1% male. | Mixed<br>(median age<br>of 25 months<br>and ranging<br>from<br>11 days to<br>83 years.) | Diarrheal<br>patients            | Stool            | Bacterial<br>culture,<br>serotyping for<br>Salmonella and<br>Shigella, real-<br>time reverse<br>transcription-<br>polymerase<br>chain reaction<br>(RT-PCR)<br>assays for viral<br>detection,<br>microscopic<br>examination for<br>parasite<br>detection. | Singleplex<br>PCR and<br>sequencing                  | Luminex<br>xTAG                  | <i>Campylobacter</i>               | 1.00 | 1.00 |
|        |                                   |                                                                                                                                                                                 |                                                                                         |                                  |                  |                                                                                                                                                                                                                                                          |                                                      |                                  | <i>C. difficile toxin A</i>        | 1.00 | 0.99 |
|        |                                   |                                                                                                                                                                                 |                                                                                         |                                  |                  |                                                                                                                                                                                                                                                          |                                                      |                                  | <i>C. difficile toxin B</i>        | 0.87 | 1.00 |
|        |                                   |                                                                                                                                                                                 |                                                                                         |                                  |                  |                                                                                                                                                                                                                                                          |                                                      |                                  | <i>E. coli O157</i>                | 1.00 | 1.00 |
|        |                                   |                                                                                                                                                                                 |                                                                                         |                                  |                  |                                                                                                                                                                                                                                                          |                                                      |                                  | <i>ETEC LT/ST</i>                  | 1.00 | 1.00 |
|        |                                   |                                                                                                                                                                                 |                                                                                         |                                  |                  |                                                                                                                                                                                                                                                          |                                                      |                                  | <i>Salmonella</i>                  | 0.85 | 0.99 |
|        |                                   |                                                                                                                                                                                 |                                                                                         |                                  |                  |                                                                                                                                                                                                                                                          |                                                      |                                  | <i>Shigella</i>                    | 1.00 | 1.00 |
|        |                                   |                                                                                                                                                                                 |                                                                                         |                                  |                  |                                                                                                                                                                                                                                                          |                                                      |                                  | <i>V. cholerae</i>                 | NA   | 1.00 |
|        |                                   |                                                                                                                                                                                 |                                                                                         |                                  |                  |                                                                                                                                                                                                                                                          |                                                      |                                  | <i>Yersinia<br/>enterocolitica</i> | 1.00 | 1.00 |
|        |                                   |                                                                                                                                                                                 |                                                                                         |                                  |                  |                                                                                                                                                                                                                                                          |                                                      |                                  | <i>Adenovirus 40/41</i>            | 1.00 | 1.00 |
|        |                                   |                                                                                                                                                                                 |                                                                                         |                                  |                  |                                                                                                                                                                                                                                                          |                                                      |                                  | <i>Norovirus GI</i>                | 1.00 | 1.00 |
|        |                                   |                                                                                                                                                                                 |                                                                                         |                                  |                  |                                                                                                                                                                                                                                                          |                                                      |                                  | <i>Norovirus GII</i>               | 1.00 | 0.99 |
|        |                                   |                                                                                                                                                                                 |                                                                                         |                                  |                  |                                                                                                                                                                                                                                                          |                                                      |                                  | <i>Rotavirus A</i>                 | 1.00 | 1.00 |
| 2      | Chhabra P et<br>al., 2017,<br>USA | Retrospective, 300<br>stool samples from<br>children and adults                                                                                                                 | Unclear                                                                                 | Patient<br>with<br>acute         | Stool            | TAC system,<br>real-time PCR<br>and sequencing                                                                                                                                                                                                           | Discordant<br>analysis                               | Luminex<br>xTAG                  | <i>Adenovirus 40/41</i>            | 0.58 | 1.00 |
|        |                                   |                                                                                                                                                                                 |                                                                                         |                                  |                  |                                                                                                                                                                                                                                                          |                                                      |                                  | <i>Norovirus GI/GII</i>            | 0.78 | 1.00 |
|        |                                   |                                                                                                                                                                                 |                                                                                         |                                  |                  |                                                                                                                                                                                                                                                          |                                                      |                                  | <i>Rotavirus A</i>                 | 0.96 | 1.00 |

|   |                                    |                                                                                       |                                                       |                         |       |                                                                                                                                           |                                                  |           |                                 |      |      |
|---|------------------------------------|---------------------------------------------------------------------------------------|-------------------------------------------------------|-------------------------|-------|-------------------------------------------------------------------------------------------------------------------------------------------|--------------------------------------------------|-----------|---------------------------------|------|------|
|   |                                    |                                                                                       |                                                       | gastroenteritis         |       |                                                                                                                                           |                                                  | FilmArray | <i>Adenovirus F 40/41</i>       | 0.97 | 0.98 |
|   |                                    |                                                                                       |                                                       |                         |       |                                                                                                                                           |                                                  |           | <i>Astrovirus</i>               | 0.97 | 0.99 |
|   |                                    |                                                                                       |                                                       |                         |       |                                                                                                                                           |                                                  |           | <i>Norovirus GI/GII</i>         | 0.88 | 1.00 |
|   |                                    |                                                                                       |                                                       |                         |       |                                                                                                                                           |                                                  |           | <i>Rotavirus A</i>              | 1.00 | 0.96 |
|   |                                    |                                                                                       |                                                       |                         |       |                                                                                                                                           |                                                  |           | <i>Sapovirus</i>                | 0.98 | 1.00 |
| 3 | Alejo-Cancho I et al., 2017, Spain | Prospective, 95 stool samples were obtained from 95 immunocompromised adult patients. | Adult patient, with a median age of 52 years (46–64). | Acute diarrheal patient | Stool | Routine microbiological techniques, including bacterial culture, <i>C. difficile</i> toxin study, microscopy for parasite, virus antigen. | Second multiplex assay (Allplex, Seegene, Korea) | FilmArray | <i>Campylobacter</i>            | 1.00 | 1.00 |
|   |                                    |                                                                                       |                                                       |                         |       |                                                                                                                                           |                                                  |           | <i>C. difficile</i> toxin A/B   | 1.00 | 1.00 |
|   |                                    |                                                                                       |                                                       |                         |       |                                                                                                                                           |                                                  |           | <i>Plesiomonas shigelloides</i> | NA   | 1.00 |
|   |                                    |                                                                                       |                                                       |                         |       |                                                                                                                                           |                                                  |           | <i>Salmonella</i>               | 1.00 | 1.00 |
|   |                                    |                                                                                       |                                                       |                         |       |                                                                                                                                           |                                                  |           | <i>Vibrio spp.</i>              | NA   | 1.00 |
|   |                                    |                                                                                       |                                                       |                         |       |                                                                                                                                           |                                                  |           | <i>Vibrio cholerae</i>          | NA   | 1.00 |
|   |                                    |                                                                                       |                                                       |                         |       |                                                                                                                                           |                                                  |           | <i>Yersinia enterocolitica</i>  | NA   | 1.00 |
|   |                                    |                                                                                       |                                                       |                         |       |                                                                                                                                           |                                                  |           | <i>EAEC</i>                     | 1.00 | 1.00 |
|   |                                    |                                                                                       |                                                       |                         |       |                                                                                                                                           |                                                  |           | <i>EPEC</i>                     | 1.00 | 0.97 |
|   |                                    |                                                                                       |                                                       |                         |       |                                                                                                                                           |                                                  |           | <i>ETEC lt/st</i>               | 1.00 | 1.00 |
|   |                                    |                                                                                       |                                                       |                         |       |                                                                                                                                           |                                                  |           | <i>STEC stx1/stx2</i>           | NA   | 1.00 |
|   |                                    |                                                                                       |                                                       |                         |       |                                                                                                                                           |                                                  |           | <i>E. coli O157</i>             | NA   | 1.00 |
|   |                                    |                                                                                       |                                                       |                         |       |                                                                                                                                           |                                                  |           | <i>Shigella/EIEC</i>            | NA   | 1.00 |
|   |                                    |                                                                                       |                                                       |                         |       |                                                                                                                                           |                                                  |           | <i>Adenovirus F 40/41</i>       | 0.00 | 1.00 |
|   |                                    |                                                                                       |                                                       |                         |       |                                                                                                                                           |                                                  |           | <i>Astrovirus</i>               | NA   | 1.00 |
|   |                                    |                                                                                       |                                                       |                         |       |                                                                                                                                           |                                                  |           | <i>Norovirus GI/GII</i>         | 1.00 | 1.00 |

|   |                                |                                                                                                                                                              |                                                                                                                                                                     |                    |       |                                           |                     |              |                                |      |      |
|---|--------------------------------|--------------------------------------------------------------------------------------------------------------------------------------------------------------|---------------------------------------------------------------------------------------------------------------------------------------------------------------------|--------------------|-------|-------------------------------------------|---------------------|--------------|--------------------------------|------|------|
|   |                                |                                                                                                                                                              |                                                                                                                                                                     |                    |       |                                           |                     |              | <i>Rotavirus A</i>             | 1.00 | 1.00 |
|   |                                |                                                                                                                                                              |                                                                                                                                                                     |                    |       |                                           |                     |              | <i>Sapovirus</i>               | NA   | 1.00 |
|   |                                |                                                                                                                                                              |                                                                                                                                                                     |                    |       |                                           |                     |              | <i>Cryptosporidium</i>         | NA   | 1.00 |
|   |                                |                                                                                                                                                              |                                                                                                                                                                     |                    |       |                                           |                     |              | <i>Cyclospora cayetanensis</i> | NA   | 1.00 |
|   |                                |                                                                                                                                                              |                                                                                                                                                                     |                    |       |                                           |                     |              | <i>Entamoeba histolytica</i>   | NA   | 1.00 |
|   |                                |                                                                                                                                                              |                                                                                                                                                                     |                    |       |                                           |                     |              | <i>Giardia lamblia</i>         | 1.00 | 1.00 |
| 4 | Duong VT et al., 2016, Vietnam | Retrospective, 479 stool samples were collected from 92 adults (>15 years) and 387 children (≤15 years old) admitted to the hospital with diarrheal disease. | The median age of the adult patients was 50 years (interquartile range [IQR], 33 to 64 years). In children, the median age was 16.5 months (IQR, 6.7 to 20 months). | Diarrheal patients | Stool | Microbiological culture and real-time PCR | Discordant analysis | Luminex xTAG | <i>Campylobacter</i>           | 0.91 | 0.99 |
|   |                                |                                                                                                                                                              |                                                                                                                                                                     |                    |       |                                           |                     |              | <i>C. difficile toxin A</i>    | NA   | NA   |
|   |                                |                                                                                                                                                              |                                                                                                                                                                     |                    |       |                                           |                     |              | <i>C. difficile toxin B</i>    | NA   | NA   |
|   |                                |                                                                                                                                                              |                                                                                                                                                                     |                    |       |                                           |                     |              | <i>E. coli O157</i>            | NA   | NA   |
|   |                                |                                                                                                                                                              |                                                                                                                                                                     |                    |       |                                           |                     |              | <i>ETEC LT/ST</i>              | NA   | NA   |
|   |                                |                                                                                                                                                              |                                                                                                                                                                     |                    |       |                                           |                     |              | <i>Salmonella</i>              | 0.90 | 0.67 |
|   |                                |                                                                                                                                                              |                                                                                                                                                                     |                    |       |                                           |                     |              | <i>STEC stx1/stx2</i>          | NA   | NA   |
|   |                                |                                                                                                                                                              |                                                                                                                                                                     |                    |       |                                           |                     |              | <i>Shigella</i>                | 0.96 | 0.99 |
|   |                                |                                                                                                                                                              |                                                                                                                                                                     |                    |       |                                           |                     |              | <i>V. cholerae</i>             | NA   | NA   |
|   |                                |                                                                                                                                                              |                                                                                                                                                                     |                    |       |                                           |                     |              | <i>Yersinia enterocolitica</i> | NA   | NA   |
|   |                                |                                                                                                                                                              |                                                                                                                                                                     |                    |       |                                           |                     |              | <i>Adenovirus 40/41</i>        | 0.92 | 0.99 |
|   |                                |                                                                                                                                                              |                                                                                                                                                                     |                    |       |                                           |                     |              | <i>Norovirus GI</i>            | 0.88 | 0.99 |
|   |                                |                                                                                                                                                              |                                                                                                                                                                     |                    |       |                                           |                     |              | <i>Norovirus GII</i>           | 0.97 | 0.99 |
|   |                                |                                                                                                                                                              |                                                                                                                                                                     |                    |       |                                           |                     |              | <i>Rotavirus A</i>             | 0.93 | 0.99 |
|   |                                |                                                                                                                                                              |                                                                                                                                                                     |                    |       |                                           |                     |              | <i>Cryptosporidium</i>         | NA   | NA   |
|   |                                |                                                                                                                                                              |                                                                                                                                                                     |                    |       |                                           |                     |              | <i>Entamoeba histolytica</i>   | NA   | NA   |

|   |                           |                                                                                       |         |                                                               |       |                                                                                               |                     |              |                                |      |      |
|---|---------------------------|---------------------------------------------------------------------------------------|---------|---------------------------------------------------------------|-------|-----------------------------------------------------------------------------------------------|---------------------|--------------|--------------------------------|------|------|
|   |                           |                                                                                       |         |                                                               |       |                                                                                               |                     |              | <i>Giardia lamblia</i>         | NA   | NA   |
|   |                           |                                                                                       |         |                                                               |       |                                                                                               |                     |              | <i>Campylobacter</i>           | 0.90 | 0.92 |
|   |                           |                                                                                       |         |                                                               |       |                                                                                               |                     |              | <i>Salmonella</i>              | 0.95 | 0.61 |
|   |                           |                                                                                       |         |                                                               |       |                                                                                               |                     |              | <i>Shigella</i>                | 1.00 | 0.88 |
| 6 | Khare R et al., 2014, USA | Prospective and retrospective, <u>230 prospectively collected samples</u>             | Unclear | Stool samples submitted to laboratory for routine GI testing. | Stool | Routine testing (e.g., culture, microscopy, antigen testing, and/or individual real-time PCR) | Discordant analysis | Luminex xTAG | <i>Campylobacter</i>           | 1.00 | 1.00 |
|   |                           |                                                                                       |         |                                                               |       |                                                                                               |                     |              | <i>C. difficile toxin A/B</i>  | 0.96 | 0.97 |
|   |                           |                                                                                       |         |                                                               |       |                                                                                               |                     |              | <i>E. coli O157</i>            | NA   | 1.00 |
|   |                           |                                                                                       |         |                                                               |       |                                                                                               |                     |              | <i>ETEC LT/ST</i>              | 1.00 | 1.00 |
|   |                           |                                                                                       |         |                                                               |       |                                                                                               |                     |              | <i>Salmonella</i>              | 1.00 | 1.00 |
|   |                           |                                                                                       |         |                                                               |       |                                                                                               |                     |              | <i>STEC stx1/stx2</i>          | NA   | 1.00 |
|   |                           |                                                                                       |         |                                                               |       |                                                                                               |                     |              | <i>Shigella</i>                | 1.00 | 1.00 |
|   |                           |                                                                                       |         |                                                               |       |                                                                                               |                     |              | <i>V. cholerae</i>             | NA   | 1.00 |
|   |                           |                                                                                       |         |                                                               |       |                                                                                               |                     |              | <i>Yersinia enterocolitica</i> | NA   | 1.00 |
|   |                           |                                                                                       |         |                                                               |       |                                                                                               |                     |              | <i>Adenovirus 40/41</i>        | 1.00 | 1.00 |
|   |                           |                                                                                       |         |                                                               |       |                                                                                               |                     |              | <i>Norovirus GI/GII</i>        | 1.00 | 0.91 |
|   |                           |                                                                                       |         |                                                               |       |                                                                                               |                     |              | <i>Rotavirus A</i>             | NA   | 0.99 |
|   |                           |                                                                                       |         |                                                               |       |                                                                                               |                     |              | <i>Cryptosporidium</i>         | 1.00 | 1.00 |
|   |                           |                                                                                       |         |                                                               |       |                                                                                               |                     |              | <i>Entamoeba histolytica</i>   | NA   | 1.00 |
|   |                           |                                                                                       |         |                                                               |       |                                                                                               |                     |              | <i>Giardia lamblia</i>         | 1.00 | 1.00 |
| 6 | Khare R et al., 2014, USA | Prospective and retrospective, <u>270 additional previously characterized samples</u> | Unclear | Stool samples submitted to laboratory                         | Stool | Routine testing (e.g., culture, microscopy, antigen testing, and/or                           | Discordant analysis | Luminex xTAG | <i>Campylobacter</i>           | 0.79 | 1.00 |
|   |                           |                                                                                       |         |                                                               |       |                                                                                               |                     |              | <i>C. difficile toxin A/B</i>  | 0.92 | 0.98 |
|   |                           |                                                                                       |         |                                                               |       |                                                                                               |                     |              | <i>E. coli O157</i>            | 0.91 | 1.00 |

|   |                           |                                                         |         |                                                               |       |                                                                                               |                     |           |                                 |      |      |
|---|---------------------------|---------------------------------------------------------|---------|---------------------------------------------------------------|-------|-----------------------------------------------------------------------------------------------|---------------------|-----------|---------------------------------|------|------|
|   |                           |                                                         |         | y for routine GI testing.                                     |       | individual real-time PCR)                                                                     |                     |           | <i>ETEC LT/ST</i>               | NA   | NA   |
|   |                           |                                                         |         |                                                               |       |                                                                                               |                     |           | <i>Salmonella</i>               | 0.83 | 1.00 |
|   |                           |                                                         |         |                                                               |       |                                                                                               |                     |           | <i>STEC stx1/stx2</i>           | 0.96 | 1.00 |
|   |                           |                                                         |         |                                                               |       |                                                                                               |                     |           | <i>Shigella</i>                 | 0.82 | NA   |
|   |                           |                                                         |         |                                                               |       |                                                                                               |                     |           | <i>V. cholerae</i>              | NA   | NA   |
|   |                           |                                                         |         |                                                               |       |                                                                                               |                     |           | <i>Yersinia enterocolitica</i>  | 0.48 | 1.00 |
|   |                           |                                                         |         |                                                               |       |                                                                                               |                     |           | <i>Adenovirus 40/41</i>         | 0.80 | 1.00 |
|   |                           |                                                         |         |                                                               |       |                                                                                               |                     |           | <i>Norovirus GI/GII</i>         | 0.93 | 0.86 |
|   |                           |                                                         |         |                                                               |       |                                                                                               |                     |           | <i>Rotavirus A</i>              | 0.93 | 1.00 |
|   |                           |                                                         |         |                                                               |       |                                                                                               |                     |           | <i>Cryptosporidium</i>          | 1.00 | 1.00 |
|   |                           |                                                         |         |                                                               |       |                                                                                               |                     |           | <i>Entamoeba histolytica</i>    | 1.00 | 1.00 |
|   |                           |                                                         |         |                                                               |       |                                                                                               |                     |           | <i>Giardia lamblia</i>          | 1.00 | 1.00 |
| 6 | Khare R et al., 2014, USA | Prospective, <u>230 prospectively collected samples</u> | Unclear | Stool samples submitted to laboratory for routine GI testing. | Stool | Routine testing (e.g., culture, microscopy, antigen testing, and/or individual real-time PCR) | Discordant analysis | FilmArray | <i>Campylobacter</i>            | 1.00 | 1.00 |
|   |                           |                                                         |         |                                                               |       |                                                                                               |                     |           | <i>C. difficile toxin A/B</i>   | 1.00 | 0.97 |
|   |                           |                                                         |         |                                                               |       |                                                                                               |                     |           | <i>Plesiomonas shigelloides</i> | NA   | 1.00 |
|   |                           |                                                         |         |                                                               |       |                                                                                               |                     |           | <i>Salmonella</i>               | 1.00 | 1.00 |
|   |                           |                                                         |         |                                                               |       |                                                                                               |                     |           | <i>Vibrio spp.</i>              | NA   | 1.00 |
|   |                           |                                                         |         |                                                               |       |                                                                                               |                     |           | <i>Vibrio cholerae</i>          | NA   | 1.00 |
|   |                           |                                                         |         |                                                               |       |                                                                                               |                     |           | <i>Yersinia enterocolitica</i>  | NA   | 1.00 |
|   |                           |                                                         |         |                                                               |       |                                                                                               |                     |           | <i>EAEC</i>                     | NA   | NA   |
|   |                           |                                                         |         |                                                               |       |                                                                                               |                     |           | <i>EPEC</i>                     | NA   | NA   |
|   |                           |                                                         |         |                                                               |       |                                                                                               |                     |           | <i>ETEC lt/st</i>               | 1.00 | 1.00 |

|   |                           |                                                                     |         |                                                               |       |                                                                                               |                     |           |                                 |      |      |
|---|---------------------------|---------------------------------------------------------------------|---------|---------------------------------------------------------------|-------|-----------------------------------------------------------------------------------------------|---------------------|-----------|---------------------------------|------|------|
|   |                           |                                                                     |         |                                                               |       |                                                                                               |                     |           | <i>STEC stx1/stx2</i>           | NA   | 1.00 |
|   |                           |                                                                     |         |                                                               |       |                                                                                               |                     |           | <i>E. coli O157</i>             | NA   | 1.00 |
|   |                           |                                                                     |         |                                                               |       |                                                                                               |                     |           | <i>Shigella/EIEC</i>            | 1.00 | 1.00 |
|   |                           |                                                                     |         |                                                               |       |                                                                                               |                     |           | <i>Adenovirus F 40/41</i>       | 1.00 | 1.00 |
|   |                           |                                                                     |         |                                                               |       |                                                                                               |                     |           | <i>Astrovirus</i>               | 1.00 | NA   |
|   |                           |                                                                     |         |                                                               |       |                                                                                               |                     |           | <i>Norovirus GI/GII</i>         | 0.92 | 1.00 |
|   |                           |                                                                     |         |                                                               |       |                                                                                               |                     |           | <i>Rotavirus A</i>              | NA   | 1.00 |
|   |                           |                                                                     |         |                                                               |       |                                                                                               |                     |           | <i>Sapovirus</i>                | 1.00 | NA   |
|   |                           |                                                                     |         |                                                               |       |                                                                                               |                     |           | <i>Cryptosporidium</i>          | 1.00 | 1.00 |
|   |                           |                                                                     |         |                                                               |       |                                                                                               |                     |           | <i>Cyclospora cayetanensis</i>  | NA   | 1.00 |
|   |                           |                                                                     |         |                                                               |       |                                                                                               |                     |           | <i>Entamoeba histolytica</i>    | NA   | 1.00 |
|   |                           |                                                                     |         |                                                               |       |                                                                                               |                     |           | <i>Giardia lamblia</i>          | 1.00 | 1.00 |
|   |                           |                                                                     |         |                                                               |       |                                                                                               |                     |           | <i>Aeromonas spp.</i>           | 1.00 | 1.00 |
| 6 | Khare R et al., 2014, USA | Prospective, 270 <u>additional previously characterized samples</u> | Unclear | Stool samples submitted to laboratory for routine GI testing. | Stool | Routine testing (e.g., culture, microscopy, antigen testing, and/or individual real-time PCR) | Discordant analysis | FilmArray | <i>Campylobacter</i>            | 0.97 | 1.00 |
|   |                           |                                                                     |         |                                                               |       |                                                                                               |                     |           | <i>C. difficile toxin A/B</i>   | 0.92 | 0.98 |
|   |                           |                                                                     |         |                                                               |       |                                                                                               |                     |           | <i>Plesiomonas shigelloides</i> | 1.00 | 1.00 |
|   |                           |                                                                     |         |                                                               |       |                                                                                               |                     |           | <i>Salmonella</i>               | 1.00 | 1.00 |
|   |                           |                                                                     |         |                                                               |       |                                                                                               |                     |           | <i>Vibrio spp.</i>              | NA   | NA   |
|   |                           |                                                                     |         |                                                               |       |                                                                                               |                     |           | <i>Vibrio cholerae</i>          | NA   | NA   |
|   |                           |                                                                     |         |                                                               |       |                                                                                               |                     |           | <i>Yersinia enterocolitica</i>  | 1.00 | 1.00 |
|   |                           |                                                                     |         |                                                               |       |                                                                                               |                     |           | <i>EAEC</i>                     | NA   | NA   |

|   |                           |                                                                                                                                                            |         |                                                                       |       |                    |                     |           |                                 |      |      |
|---|---------------------------|------------------------------------------------------------------------------------------------------------------------------------------------------------|---------|-----------------------------------------------------------------------|-------|--------------------|---------------------|-----------|---------------------------------|------|------|
|   |                           |                                                                                                                                                            |         |                                                                       |       |                    |                     |           | <i>EPEC</i>                     | NA   | NA   |
|   |                           |                                                                                                                                                            |         |                                                                       |       |                    |                     |           | <i>ETEC</i> lt/st               | NA   | NA   |
|   |                           |                                                                                                                                                            |         |                                                                       |       |                    |                     |           | <i>STEC</i> stx1/stx2           | 1.00 | 0.99 |
|   |                           |                                                                                                                                                            |         |                                                                       |       |                    |                     |           | <i>E. coli</i> O157             | 1.00 | 1.00 |
|   |                           |                                                                                                                                                            |         |                                                                       |       |                    |                     |           | <i>Shigella</i> /EIEC           | 0.91 | 1.00 |
|   |                           |                                                                                                                                                            |         |                                                                       |       |                    |                     |           | <i>Adenovirus F</i> 40/41       | 0.90 | 0.99 |
|   |                           |                                                                                                                                                            |         |                                                                       |       |                    |                     |           | <i>Astrovirus</i>               | 1.00 | 1.00 |
|   |                           |                                                                                                                                                            |         |                                                                       |       |                    |                     |           | <i>Norovirus</i> GI/GII         | 0.93 | 1.00 |
|   |                           |                                                                                                                                                            |         |                                                                       |       |                    |                     |           | <i>Rotavirus A</i>              | 1.00 | 1.00 |
|   |                           |                                                                                                                                                            |         |                                                                       |       |                    |                     |           | <i>Sapovirus</i>                | 0.90 | 1.00 |
|   |                           |                                                                                                                                                            |         |                                                                       |       |                    |                     |           | <i>Cryptosporidium</i>          | 1.00 | 1.00 |
|   |                           |                                                                                                                                                            |         |                                                                       |       |                    |                     |           | <i>Cyclospora cayetanensis</i>  | NA   | NA   |
|   |                           |                                                                                                                                                            |         |                                                                       |       |                    |                     |           | <i>Entamoeba histolytica</i>    | NA   | 1.00 |
|   |                           |                                                                                                                                                            |         |                                                                       |       |                    |                     |           | <i>Giardia lamblia</i>          | 1.00 | 1.00 |
|   |                           |                                                                                                                                                            |         |                                                                       |       |                    |                     |           | <i>Aeromonas</i> spp.           | 0.24 | 1.00 |
| 7 | Buss SN et al., 2015, USA | Prospective, 1556 stool samples from 584 adult (older than 21 years old [38%]) and 972 pediatric (younger than or equal to 21 years old [62%]) populations | Unclear | Stool samples submitted with orders by the provider for stool culture | Stool | Stool culture, PCR | Discordant analysis | FilmArray | <i>Campylobacter</i>            | 0.97 | 0.98 |
|   |                           |                                                                                                                                                            |         |                                                                       |       |                    |                     |           | <i>C. difficile</i> toxin A/B   | 0.99 | 0.97 |
|   |                           |                                                                                                                                                            |         |                                                                       |       |                    |                     |           | <i>Plesiomonas shigelloides</i> | 1.00 | 0.99 |
|   |                           |                                                                                                                                                            |         |                                                                       |       |                    |                     |           | <i>Salmonella</i>               | 1.00 | 1.00 |
|   |                           |                                                                                                                                                            |         |                                                                       |       |                    |                     |           | <i>Vibrio</i> spp.              | NA   | 1.00 |
|   |                           |                                                                                                                                                            |         |                                                                       |       |                    |                     |           | <i>Vibrio cholerae</i>          | NA   | 1.00 |



|   |                                    |                                                                         |         |                                   |       |                                                                        |                     |              |                                |      |      |
|---|------------------------------------|-------------------------------------------------------------------------|---------|-----------------------------------|-------|------------------------------------------------------------------------|---------------------|--------------|--------------------------------|------|------|
|   |                                    |                                                                         |         |                                   |       |                                                                        |                     |              | <i>Yersinia enterocolitica</i> | NA   | 1.00 |
|   |                                    |                                                                         |         |                                   |       |                                                                        |                     |              | <i>EAEC</i>                    | 0.99 | 0.98 |
|   |                                    |                                                                         |         |                                   |       |                                                                        |                     |              | <i>EPEC</i>                    | 0.99 | 0.97 |
|   |                                    |                                                                         |         |                                   |       |                                                                        |                     |              | <i>ETEC lt/st</i>              | 1.00 | 0.99 |
|   |                                    |                                                                         |         |                                   |       |                                                                        |                     |              | <i>STEC stx1/stx2</i>          | 1.00 | 1.00 |
|   |                                    |                                                                         |         |                                   |       |                                                                        |                     |              | <i>E. coli O157</i>            | 1.00 | 0.97 |
|   |                                    |                                                                         |         |                                   |       |                                                                        |                     |              | <i>Shigella/EIEC</i>           | 0.96 | 1.00 |
|   |                                    |                                                                         |         |                                   |       |                                                                        |                     |              | <i>Adenovirus F 40/41</i>      | 0.96 | 1.00 |
|   |                                    |                                                                         |         |                                   |       |                                                                        |                     |              | <i>Astrovirus</i>              | 1.00 | 1.00 |
|   |                                    |                                                                         |         |                                   |       |                                                                        |                     |              | <i>Norovirus GI/GII</i>        | 0.95 | 0.99 |
|   |                                    |                                                                         |         |                                   |       |                                                                        |                     |              | <i>Rotavirus A</i>             | 1.00 | 0.99 |
|   |                                    |                                                                         |         |                                   |       |                                                                        |                     |              | <i>Sapovirus</i>               | 1.00 | 0.99 |
|   |                                    |                                                                         |         |                                   |       |                                                                        |                     |              | <i>Cryptosporidium</i>         | 1.00 | 1.00 |
|   |                                    |                                                                         |         |                                   |       |                                                                        |                     |              | <i>Cyclospora cayetanensis</i> | 1.00 | 1.00 |
|   |                                    |                                                                         |         |                                   |       |                                                                        |                     |              | <i>Entamoeba histolytica</i>   | NA   | 1.00 |
|   |                                    |                                                                         |         |                                   |       |                                                                        |                     |              | <i>Giardia lamblia</i>         | 1.00 | 1.00 |
| 8 | Claas EC et al., 2013, Netherlands | Prospective, 901 stool specimens from both pediatric and adult patients | Unclear | Stool collected in four hospitals | Stool | Routine testing (e.g., culture, microscopy, EIA/DFA, or real-time PCR) | Discordant analysis | Luminex xTAG | <i>Campylobacter</i>           | 1.00 | 0.82 |
|   |                                    |                                                                         |         |                                   |       |                                                                        |                     |              | <i>C. difficile toxin A/B</i>  | 1.00 | 0.91 |
|   |                                    |                                                                         |         |                                   |       |                                                                        |                     |              | <i>E. coli O157</i>            | 0.83 | 0.99 |
|   |                                    |                                                                         |         |                                   |       |                                                                        |                     |              | <i>ETEC LT/ST</i>              | NA   | 1.00 |
|   |                                    |                                                                         |         |                                   |       |                                                                        |                     |              | <i>Salmonella</i>              | 0.97 | 0.95 |

|  |  |  |  |  |  |  |  |  |                                |      |      |
|--|--|--|--|--|--|--|--|--|--------------------------------|------|------|
|  |  |  |  |  |  |  |  |  | <i>STEC stx1/stx2</i>          | 1.00 | 1.00 |
|  |  |  |  |  |  |  |  |  | <i>Shigella</i>                | 0.97 | 0.98 |
|  |  |  |  |  |  |  |  |  | <i>V. cholerae</i>             | NA   | 1.00 |
|  |  |  |  |  |  |  |  |  | <i>Yersinia enterocolitica</i> | 0.00 | 1.00 |
|  |  |  |  |  |  |  |  |  | <i>Adenovirus 40/41</i>        | 1.00 | 1.00 |
|  |  |  |  |  |  |  |  |  | <i>Norovirus GI</i>            | NA   | 1.00 |
|  |  |  |  |  |  |  |  |  | <i>Norovirus GII</i>           | 1.00 | 0.99 |
|  |  |  |  |  |  |  |  |  | <i>Rotavirus A</i>             | 0.00 | 1.00 |
|  |  |  |  |  |  |  |  |  | <i>Cryptosporidium</i>         | NA   | 1.00 |
|  |  |  |  |  |  |  |  |  | <i>Entamoeba histolytica</i>   | NA   | 1.00 |
|  |  |  |  |  |  |  |  |  | <i>Giardia lamblia</i>         | NA   | 0.96 |
|  |  |  |  |  |  |  |  |  | <i>Adenovirus F 40/41</i>      | 0.20 | 0.99 |
|  |  |  |  |  |  |  |  |  | <i>Astrovirus</i>              | 1.00 | 1.00 |
|  |  |  |  |  |  |  |  |  | <i>Norovirus GI/GII</i>        | 0.93 | 0.98 |
|  |  |  |  |  |  |  |  |  | <i>Rotavirus A</i>             | 1.00 | 1.00 |
|  |  |  |  |  |  |  |  |  | <i>Cryptosporidium</i>         | 0.91 | 1.00 |
|  |  |  |  |  |  |  |  |  | <i>Entamoeba histolytica</i>   | 1.00 | 0.99 |
|  |  |  |  |  |  |  |  |  | <i>Giardia lamblia</i>         | 1.00 | 0.99 |
|  |  |  |  |  |  |  |  |  | <i>Campylobacter</i>           | 0.97 | 0.96 |
|  |  |  |  |  |  |  |  |  | <i>E. coli O157</i>            | 0.94 | 0.99 |
|  |  |  |  |  |  |  |  |  | <i>Salmonella</i>              | 0.83 | 0.99 |
|  |  |  |  |  |  |  |  |  | <i>Shigella</i>                | 1.00 | 0.97 |

|   |                             |                                                                                                                                                                                                                                                                    |         |                    |       |                                                                                                                            |                     |              |                                |      |      |
|---|-----------------------------|--------------------------------------------------------------------------------------------------------------------------------------------------------------------------------------------------------------------------------------------------------------------|---------|--------------------|-------|----------------------------------------------------------------------------------------------------------------------------|---------------------|--------------|--------------------------------|------|------|
|   |                             |                                                                                                                                                                                                                                                                    |         |                    |       |                                                                                                                            |                     |              | <i>V. cholerae</i>             | 0.00 | 1.00 |
|   |                             |                                                                                                                                                                                                                                                                    |         |                    |       |                                                                                                                            |                     |              | <i>Yersinia enterocolitica</i> | NA   | 1.00 |
|   |                             |                                                                                                                                                                                                                                                                    |         |                    |       |                                                                                                                            |                     |              | <i>Cryptosporidium</i>         | 0.92 | 1.00 |
|   |                             |                                                                                                                                                                                                                                                                    |         |                    |       |                                                                                                                            |                     |              | <i>Entamoeba histolytica</i>   | NA   | 0.99 |
|   |                             |                                                                                                                                                                                                                                                                    |         |                    |       |                                                                                                                            |                     |              | <i>Giardia lamblia</i>         | 1.00 | 0.97 |
|   |                             |                                                                                                                                                                                                                                                                    |         |                    |       |                                                                                                                            |                     |              | <i>C. difficile toxin A/B</i>  | 0.97 | 0.97 |
|   |                             |                                                                                                                                                                                                                                                                    |         |                    |       |                                                                                                                            |                     |              | <i>ETEC lt/st</i>              | NA   | 0.91 |
|   |                             |                                                                                                                                                                                                                                                                    |         |                    |       |                                                                                                                            |                     |              | <i>STEC stx1/stx2</i>          | 1.00 | 0.99 |
|   |                             |                                                                                                                                                                                                                                                                    |         |                    |       |                                                                                                                            |                     |              | <i>Cryptosporidium</i>         | NA   | 1.00 |
|   |                             |                                                                                                                                                                                                                                                                    |         |                    |       |                                                                                                                            |                     |              | <i>Giardia lamblia</i>         | NA   | 1.00 |
| 9 | Halligan E et al., 2014, UK | Prospective, 2187 diarrhoeal stool samples. 986 (45%) samples originated from inpatients developing symptoms in the first 4 days of admission or from outpatient clinics, and the remaining 1201 (55%) samples were from inpatients on day 4 or more of admission. | Unclear | Diarrheal patients | Stool | Conventional tests including microbiological culture, microscopy, microwell enzyme immunoassay, immunochromatographic test | Discordant analysis | Luminex xTAG | <i>Campylobacter</i>           | 1.00 | 0.97 |
|   |                             |                                                                                                                                                                                                                                                                    |         |                    |       |                                                                                                                            |                     |              | <i>C. difficile toxin A/B</i>  | 0.95 | 0.99 |
|   |                             |                                                                                                                                                                                                                                                                    |         |                    |       |                                                                                                                            |                     |              | <i>E. coli O157</i>            | 1.00 | 1.00 |
|   |                             |                                                                                                                                                                                                                                                                    |         |                    |       |                                                                                                                            |                     |              | <i>ETEC LT/ST</i>              | NA   | NA   |
|   |                             |                                                                                                                                                                                                                                                                    |         |                    |       |                                                                                                                            |                     |              | <i>Salmonella</i>              | 1.00 | 0.97 |
|   |                             |                                                                                                                                                                                                                                                                    |         |                    |       |                                                                                                                            |                     |              | <i>STEC stx1/stx2</i>          | NA   | NA   |
|   |                             |                                                                                                                                                                                                                                                                    |         |                    |       |                                                                                                                            |                     |              | <i>Shigella</i>                | 1.00 | 0.99 |
|   |                             |                                                                                                                                                                                                                                                                    |         |                    |       |                                                                                                                            |                     |              | <i>V. cholerae</i>             | NA   | NA   |
|   |                             |                                                                                                                                                                                                                                                                    |         |                    |       |                                                                                                                            |                     |              | <i>Yersinia enterocolitica</i> | NA   | NA   |
|   |                             |                                                                                                                                                                                                                                                                    |         |                    |       |                                                                                                                            |                     |              | <i>Adenovirus 40/41</i>        | 1.00 | 0.99 |
|   |                             |                                                                                                                                                                                                                                                                    |         |                    |       |                                                                                                                            |                     |              | <i>Norovirus GI/GII</i>        | 0.83 | 0.94 |

|    |                                 |                                                                       |                                                                                                                                                                                                                                                                                                                    |                    |       |                                                                                                        |                     |              |                                |      |      |
|----|---------------------------------|-----------------------------------------------------------------------|--------------------------------------------------------------------------------------------------------------------------------------------------------------------------------------------------------------------------------------------------------------------------------------------------------------------|--------------------|-------|--------------------------------------------------------------------------------------------------------|---------------------|--------------|--------------------------------|------|------|
|    |                                 |                                                                       |                                                                                                                                                                                                                                                                                                                    |                    |       |                                                                                                        |                     |              | <i>Rotavirus A</i>             | 1.00 | 0.96 |
|    |                                 |                                                                       |                                                                                                                                                                                                                                                                                                                    |                    |       |                                                                                                        |                     |              | <i>Cryptosporidium</i>         | 1.00 | 0.97 |
|    |                                 |                                                                       |                                                                                                                                                                                                                                                                                                                    |                    |       |                                                                                                        |                     |              | <i>Entamoeba histolytica</i>   | 0.00 | 0.96 |
|    |                                 |                                                                       |                                                                                                                                                                                                                                                                                                                    |                    |       |                                                                                                        |                     |              | <i>Giardia lamblia</i>         | 1.00 | 0.93 |
| 10 | Mengelle C et al., 2013, France | Prospective, 440 stool samples collected from 329 diarrhoeic patients | Three groups included immunosuppressed hospitalized patients: 102 adult organ transplant recipients (mean age, 50.6; median, 56; range, 17–75), 50 immunosuppressed children (mean age, 5; median, 7; range, 0–14) and 56 children attending the neonatal unit (aged under 1 year). The 121 children attending the | Diarrheal patients | Stool | Routine diagnostic methods (e.g., culture, microscopy, immunochromatographic assay, and multiplex PCR) | Discordant analysis | Luminex xTAG | <i>Campylobacter</i>           | 1.00 | 0.97 |
|    |                                 |                                                                       |                                                                                                                                                                                                                                                                                                                    |                    |       |                                                                                                        |                     |              | <i>C. difficile toxin A/B</i>  | 1.00 | 0.98 |
|    |                                 |                                                                       |                                                                                                                                                                                                                                                                                                                    |                    |       |                                                                                                        |                     |              | <i>E. coli O157</i>            | NA   | 1.00 |
|    |                                 |                                                                       |                                                                                                                                                                                                                                                                                                                    |                    |       |                                                                                                        |                     |              | <i>ETEC LT/ST</i>              | NA   | 1.00 |
|    |                                 |                                                                       |                                                                                                                                                                                                                                                                                                                    |                    |       |                                                                                                        |                     |              | <i>Salmonella</i>              | 0.78 | 0.96 |
|    |                                 |                                                                       |                                                                                                                                                                                                                                                                                                                    |                    |       |                                                                                                        |                     |              | <i>STEC stx1/stx2</i>          | 1.00 | 0.99 |
|    |                                 |                                                                       |                                                                                                                                                                                                                                                                                                                    |                    |       |                                                                                                        |                     |              | <i>Shigella</i>                | 1.00 | 1.00 |
|    |                                 |                                                                       |                                                                                                                                                                                                                                                                                                                    |                    |       |                                                                                                        |                     |              | <i>V. cholerae</i>             | NA   | 1.00 |
|    |                                 |                                                                       |                                                                                                                                                                                                                                                                                                                    |                    |       |                                                                                                        |                     |              | <i>Yersinia enterocolitica</i> | NA   | 1.00 |
|    |                                 |                                                                       |                                                                                                                                                                                                                                                                                                                    |                    |       |                                                                                                        |                     |              | <i>Adenovirus 40/41</i>        | 0.00 | 1.00 |
|    |                                 |                                                                       |                                                                                                                                                                                                                                                                                                                    |                    |       |                                                                                                        |                     |              | <i>Norovirus GI/GII</i>        | 0.00 | 0.94 |
|    |                                 |                                                                       |                                                                                                                                                                                                                                                                                                                    |                    |       |                                                                                                        |                     |              | <i>Rotavirus A</i>             | 0.97 | 0.97 |
|    |                                 |                                                                       |                                                                                                                                                                                                                                                                                                                    |                    |       |                                                                                                        |                     |              | <i>Cryptosporidium</i>         | NA   | 0.99 |
|    |                                 |                                                                       |                                                                                                                                                                                                                                                                                                                    |                    |       |                                                                                                        |                     |              | <i>Entamoeba histolytica</i>   | NA   | 1.00 |
|    |                                 |                                                                       |                                                                                                                                                                                                                                                                                                                    |                    |       |                                                                                                        |                     |              | <i>Giardia lamblia</i>         | NA   | 1.00 |

|   |                                   |                                                                         |                                                                                            |                                    |       |                                                                                              |                                               |              |                                |      |      |
|---|-----------------------------------|-------------------------------------------------------------------------|--------------------------------------------------------------------------------------------|------------------------------------|-------|----------------------------------------------------------------------------------------------|-----------------------------------------------|--------------|--------------------------------|------|------|
|   |                                   |                                                                         | emergency unit (mean age, 2.80; median, 9; range, 0–16) were considered to be outpatients. |                                    |       |                                                                                              |                                               |              |                                |      |      |
| 1 | Zboromyrska Y et al., 2014, Spain | Prospective, 185 stool samples from patients with traveller's diarrhea. | Unclear                                                                                    | Patients with traveller's diarrhea | Stool | Routine diagnostic methods (e.g., culture, microscopy, mass spectrometry, and multiplex PCR) | Conventional PCR and bidirectional sequencing | Luminex xTAG | <i>Campylobacter</i>           | 1.00 | 1.00 |
| 1 |                                   |                                                                         |                                                                                            |                                    |       |                                                                                              |                                               |              | <i>C. difficile toxin A/B</i>  | NA   | 1.00 |
|   |                                   |                                                                         |                                                                                            |                                    |       |                                                                                              |                                               |              | <i>E. coli O157</i>            | 1.00 | 1.00 |
|   |                                   |                                                                         |                                                                                            |                                    |       |                                                                                              |                                               |              | <i>ETEC LT/ST</i>              | 1.00 | 0.97 |
|   |                                   |                                                                         |                                                                                            |                                    |       |                                                                                              |                                               |              | <i>Salmonella</i>              | 1.00 | 1.00 |
|   |                                   |                                                                         |                                                                                            |                                    |       |                                                                                              |                                               |              | <i>STEC stx1/stx2</i>          | 1.00 | 1.00 |
|   |                                   |                                                                         |                                                                                            |                                    |       |                                                                                              |                                               |              | <i>Shigella</i>                | 1.00 | 0.99 |
|   |                                   |                                                                         |                                                                                            |                                    |       |                                                                                              |                                               |              | <i>V. cholerae</i>             | NA   | NA   |
|   |                                   |                                                                         |                                                                                            |                                    |       |                                                                                              |                                               |              | <i>Yersinia enterocolitica</i> | NA   | NA   |
|   |                                   |                                                                         |                                                                                            |                                    |       |                                                                                              |                                               |              | <i>Adenovirus 40/41</i>        | NA   | NA   |
|   |                                   |                                                                         |                                                                                            |                                    |       |                                                                                              |                                               |              | <i>Norovirus GI/GII</i>        | NA   | 0.99 |
|   |                                   |                                                                         |                                                                                            |                                    |       |                                                                                              |                                               |              | <i>Rotavirus A</i>             | NA   | 1.00 |
|   |                                   |                                                                         |                                                                                            |                                    |       |                                                                                              |                                               |              | <i>Cryptosporidium</i>         | NA   | NA   |
|   |                                   |                                                                         |                                                                                            |                                    |       |                                                                                              |                                               |              | <i>Entamoeba histolytica</i>   | 1.00 | 0.99 |
|   |                                   |                                                                         |                                                                                            |                                    |       |                                                                                              |                                               |              | <i>Giardia lamblia</i>         | 1.00 | 0.99 |
|   |                                   |                                                                         | Unclear                                                                                    |                                    | Stool |                                                                                              |                                               |              | <i>Campylobacter</i>           | 0.92 | 1.00 |

|        |                            |                                                                                                                                 |         |                                    |       |                                                                                                         |                     |              |                         |      |      |
|--------|----------------------------|---------------------------------------------------------------------------------------------------------------------------------|---------|------------------------------------|-------|---------------------------------------------------------------------------------------------------------|---------------------|--------------|-------------------------|------|------|
| 1<br>2 | Huang RS et al., 2016, USA | 98 retrospective and 54 prospective samples collected from pediatric patients with signs and symptoms of acute gastroenteritis. |         | Patient with acute gastroenteritis |       | Conventional testing including stool cultures, immunochromatographic rapid tests, and singleplex RT-PCR | Discordant analysis | Luminex xTAG | <i>Salmonella</i>       | 0.79 | 1.00 |
|        |                            |                                                                                                                                 |         |                                    |       |                                                                                                         |                     |              | <i>STEC stx1/stx2</i>   | 0.92 | 1.00 |
|        |                            |                                                                                                                                 |         |                                    |       |                                                                                                         |                     |              | <i>Shigella</i>         | 1.00 | 1.00 |
|        |                            |                                                                                                                                 |         |                                    |       |                                                                                                         |                     |              | <i>Norovirus GI/GII</i> | 0.90 | 1.00 |
|        |                            |                                                                                                                                 |         |                                    |       |                                                                                                         |                     |              | <i>Rotavirus A</i>      | 1.00 | 1.00 |
| 1<br>2 | Huang RS et al., 2016, USA | 98 retrospective and 54 prospective samples collected from pediatric patients with signs and symptoms of acute gastroenteritis. | Unclear | Patient with acute gastroenteritis | stool | Conventional testing including stool cultures, immunochromatographic rapid tests, and singleplex RT-PCR | Discordant analysis | FilmArray    | <i>Campylobacter</i>    | 1.00 | 1.00 |
|        |                            |                                                                                                                                 |         |                                    |       |                                                                                                         |                     |              | <i>Salmonella</i>       | 0.96 | 1.00 |
|        |                            |                                                                                                                                 |         |                                    |       |                                                                                                         |                     |              | <i>STEC stx1/stx2</i>   | 1.00 | 1.00 |
|        |                            |                                                                                                                                 |         |                                    |       |                                                                                                         |                     |              | <i>Shigella</i>         | 1.00 | 1.00 |
|        |                            |                                                                                                                                 |         |                                    |       |                                                                                                         |                     |              | <i>Norovirus GI/GII</i> | 0.95 | 0.99 |
|        |                            |                                                                                                                                 |         |                                    |       |                                                                                                         |                     |              | <i>Rotavirus A</i>      | 1.00 | 0.99 |

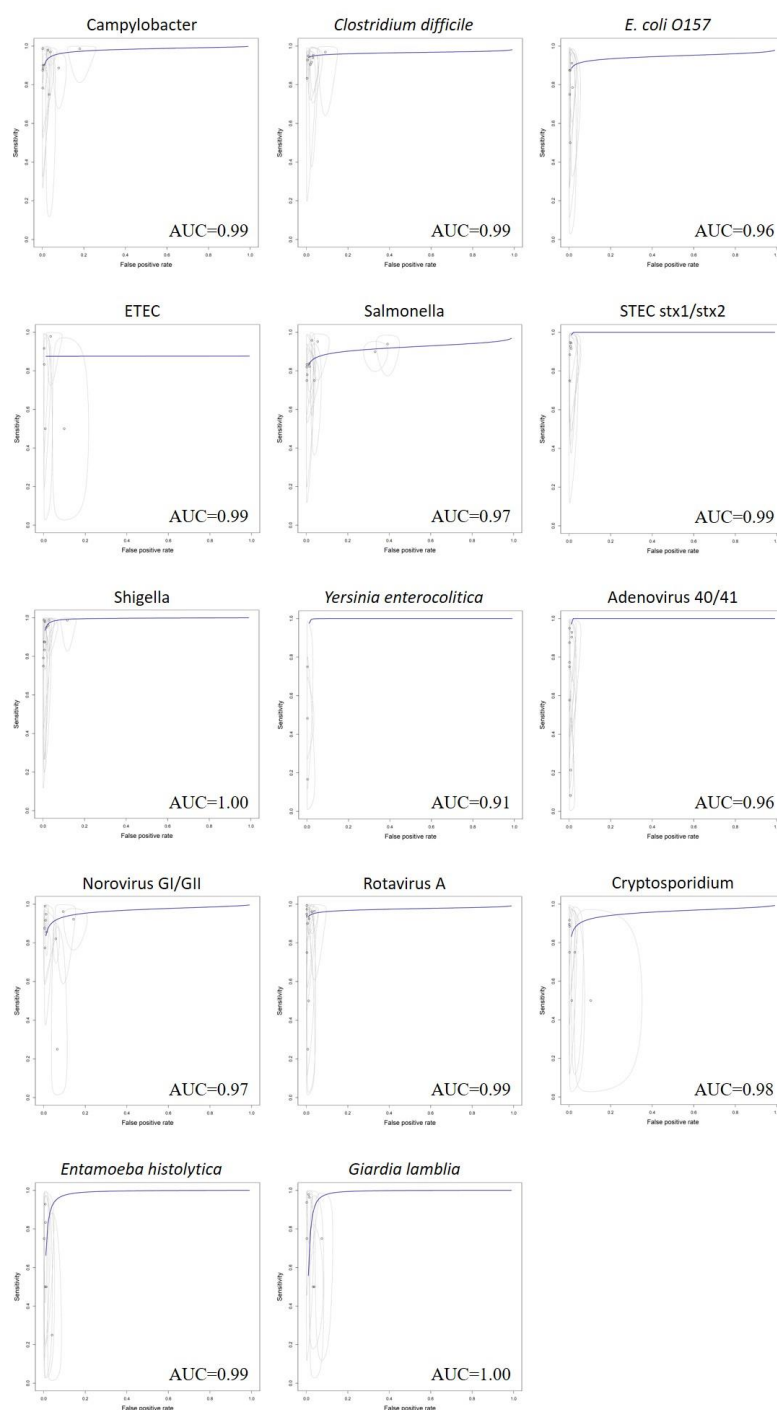

**Supplementary materials S6.** Receiver operating curve (ROC) analysis of Luminex xTAG GI panel for detection of different pathogens. The blue lines indicate the receiver operating curve. The blue lines indicate the receiver operating curve. The grey dots represent estimates of individual studies and grey circles around the dots represent the 95% confidence interval.

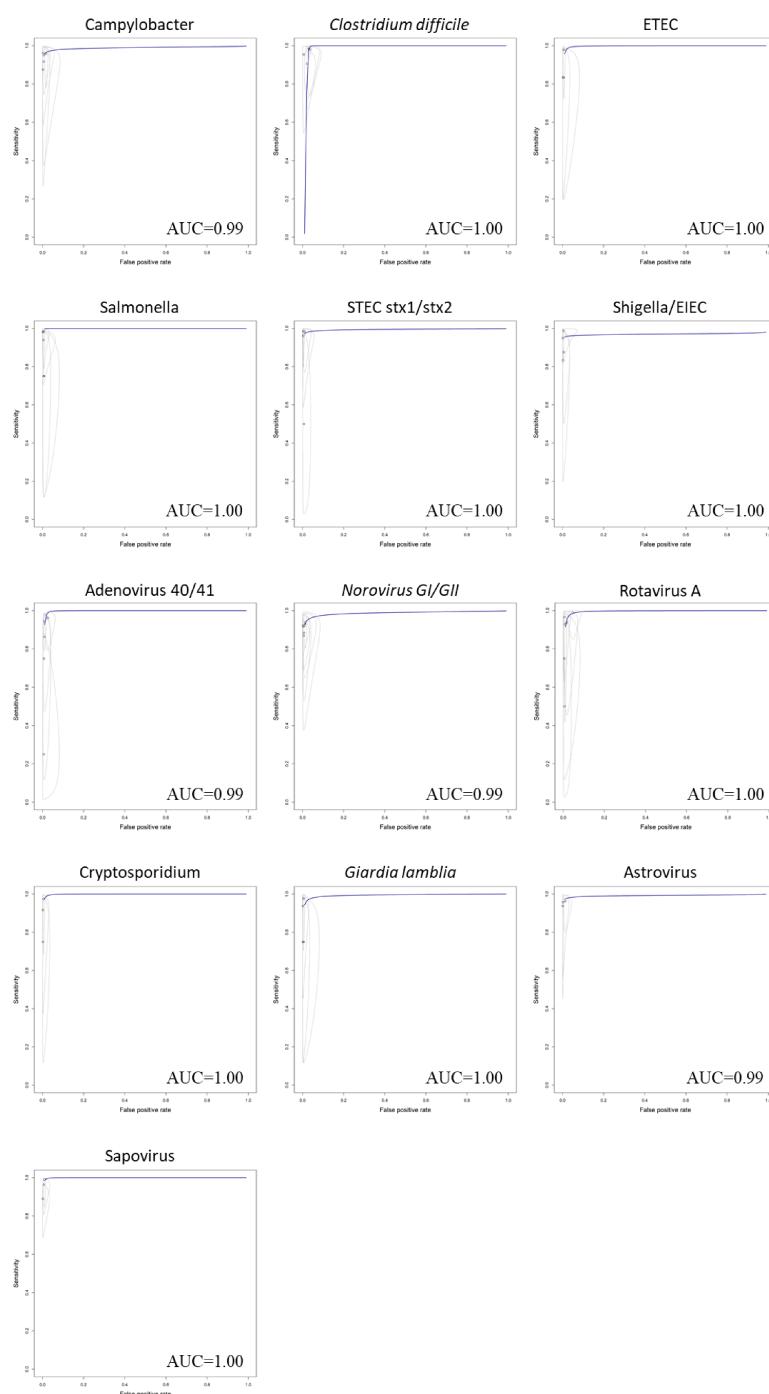

**Supplementary materials S7.** Receiver operating curve (ROC) analysis of FilmArray GI panel for detection of different pathogens. The blue lines indicate the receiver operating curve. The blue lines indicate the receiver operating curve. The grey dots represent estimates of individual studies and grey circles around the dots represent the 95% confidence interval.



(A)

Campylobacter

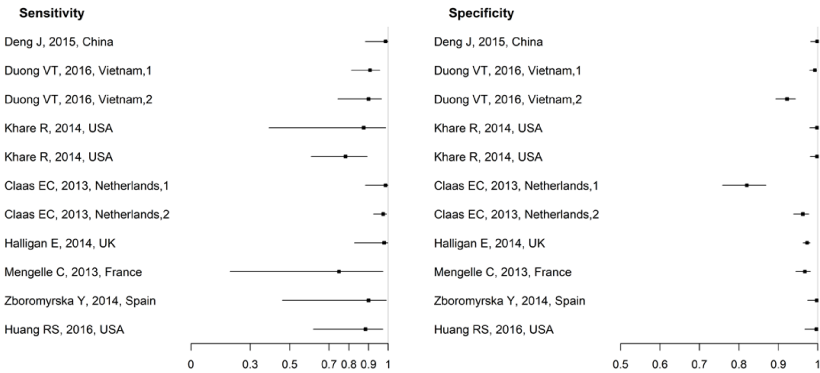

Clostridium difficile

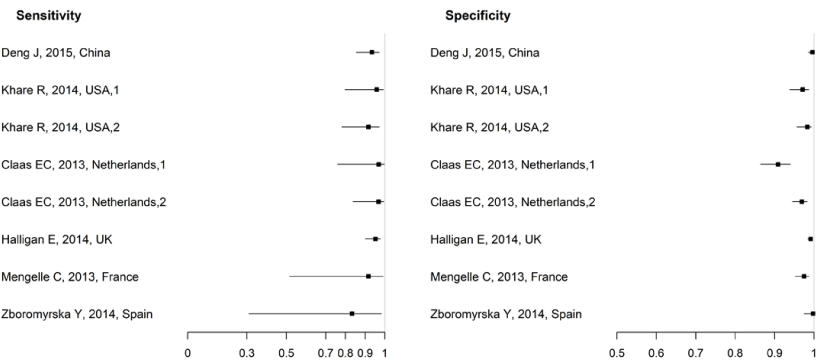

E. coli O157

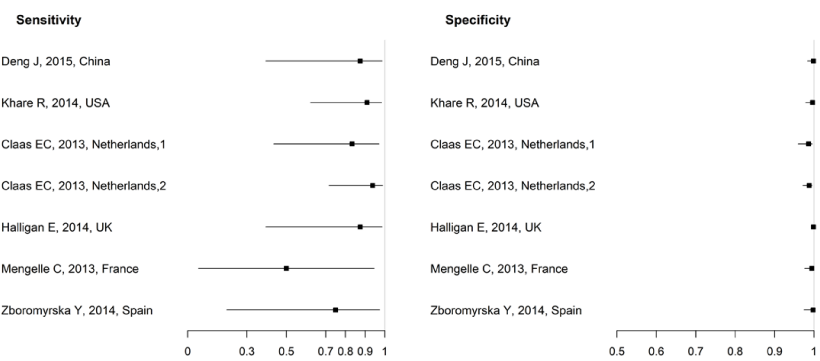

ETEC

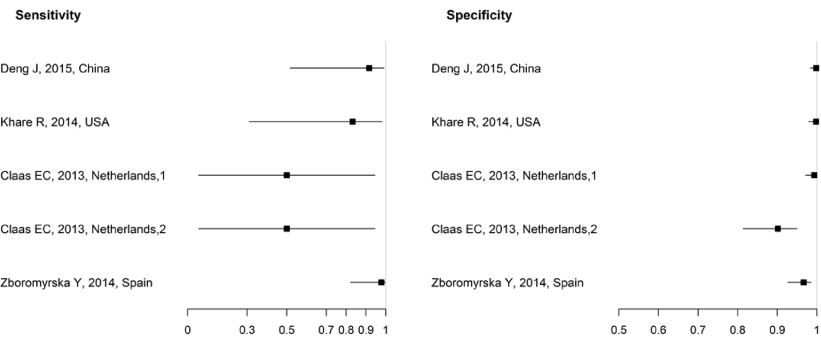

Salmonella

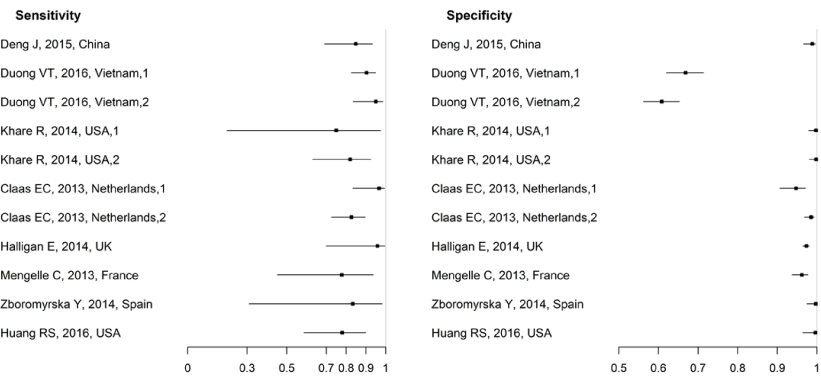

STEC stx1/stx2

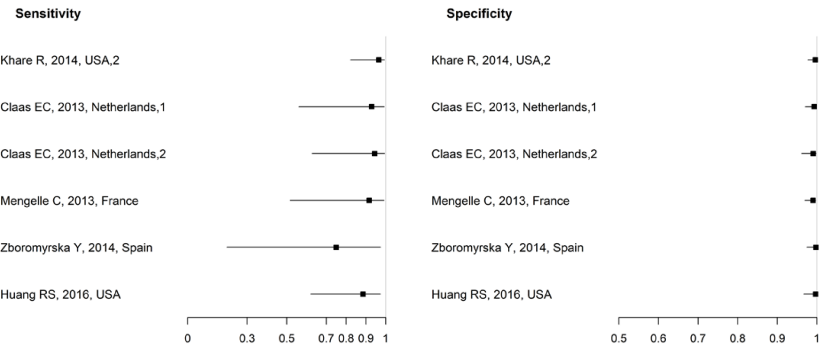

Shigella

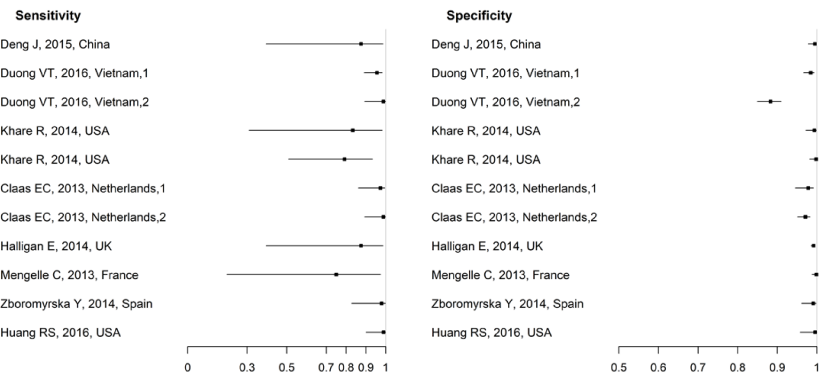

*Yersinia enterocolitica*

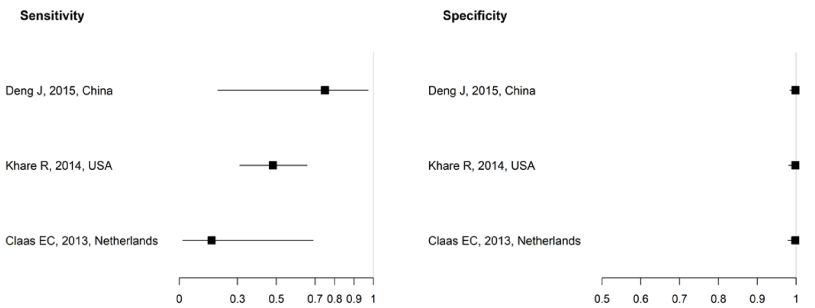

Adenovirus 40/41

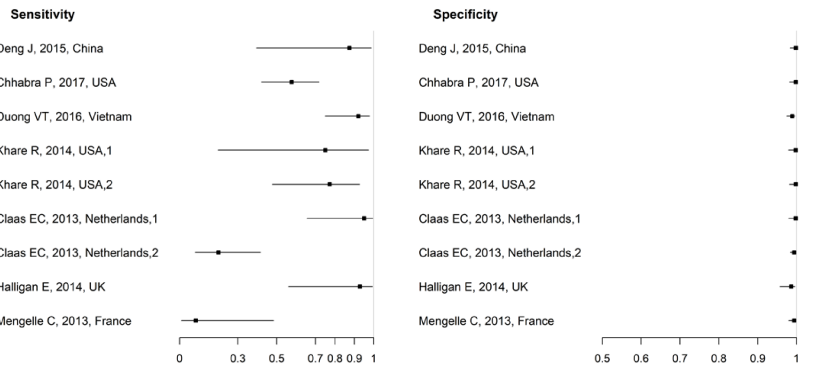

Norovirus GI/GII

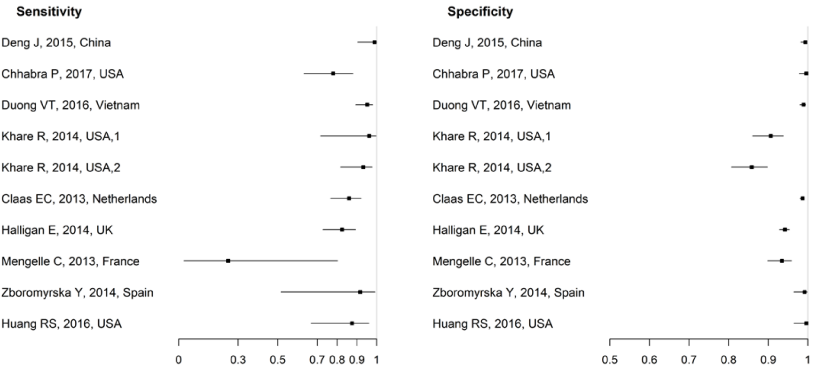

Rotavirus

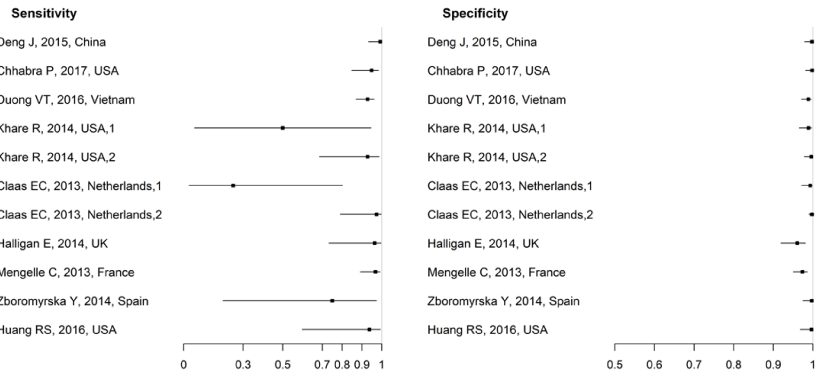

Cryptosporidium

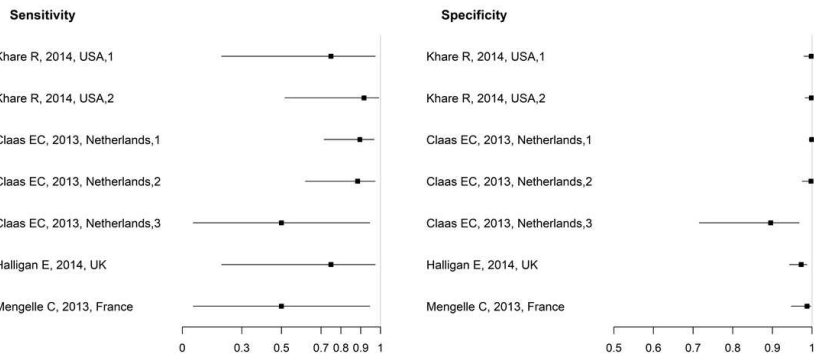

Entamoeba histolytica

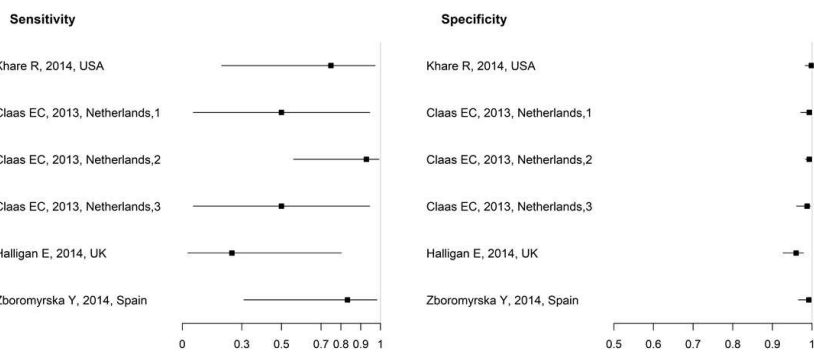

Giardia lamblia

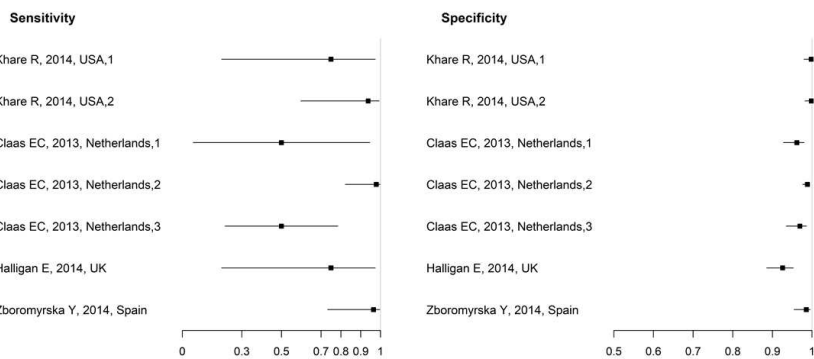

(B)

Campylobacter

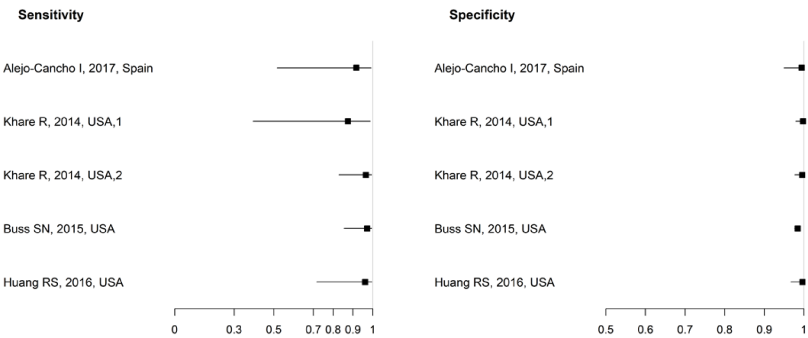

Clostridium difficile

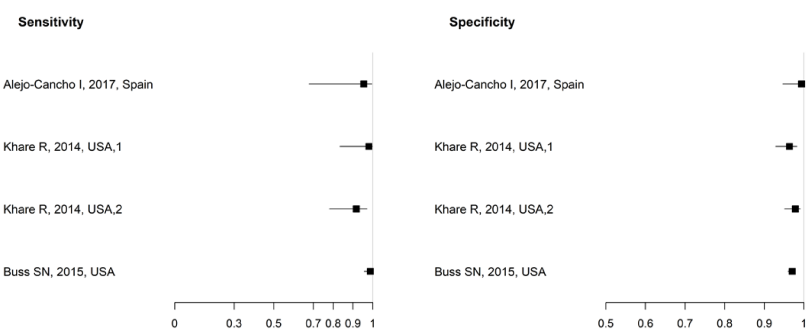

ETEC

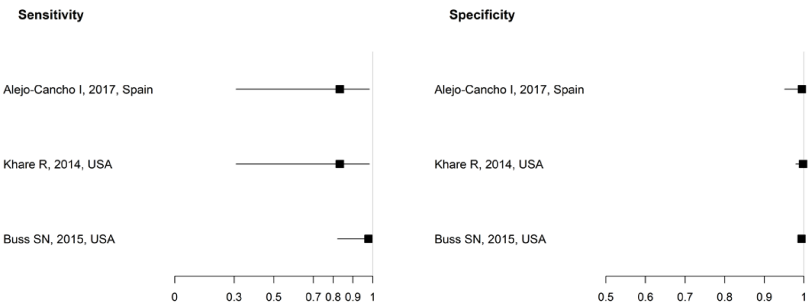

Salmonella

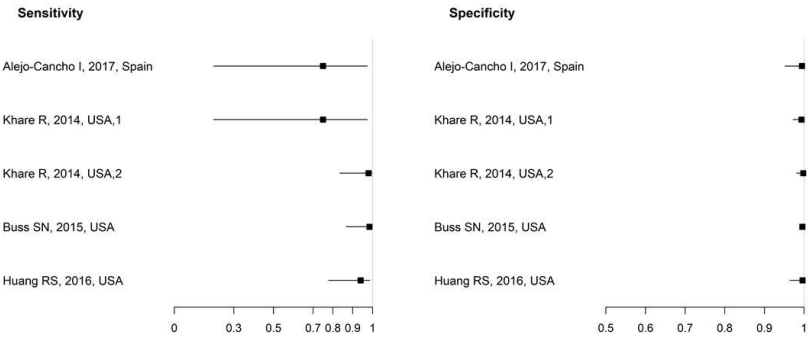

STEC stx1/stx2

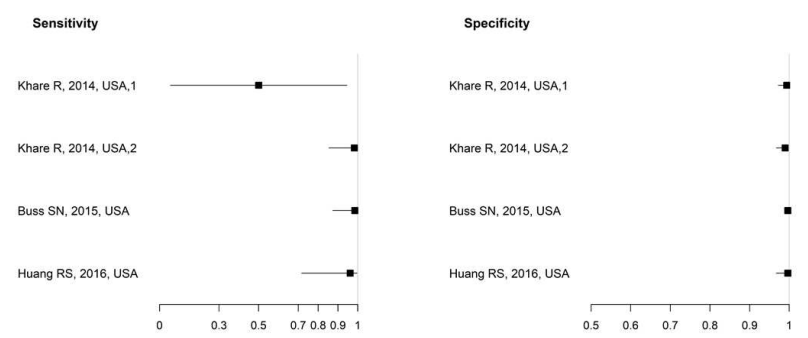

Shigella/EIEC

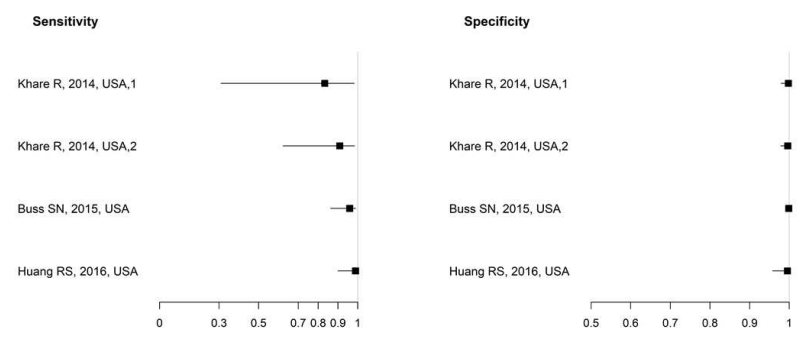

Adenovirus

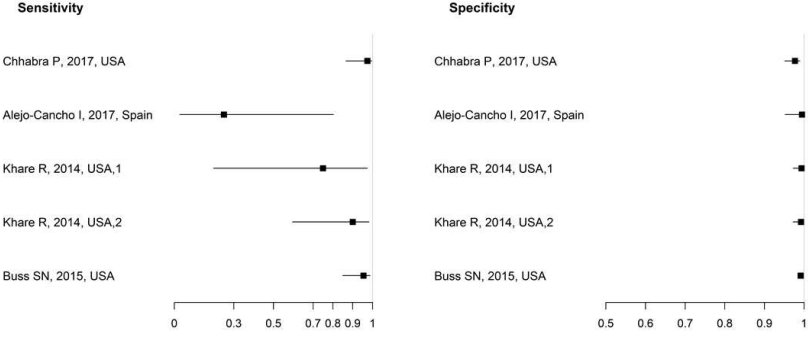

Astrovirus

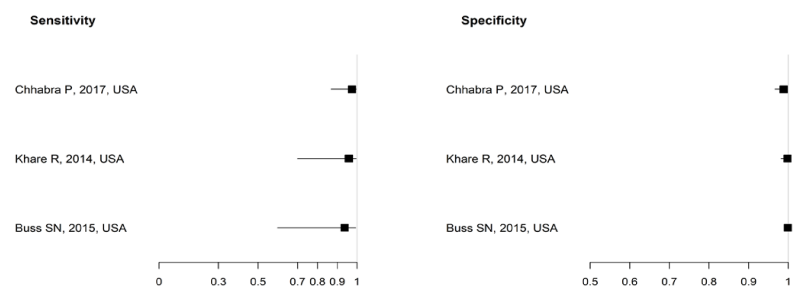

Norovirus GI/GII

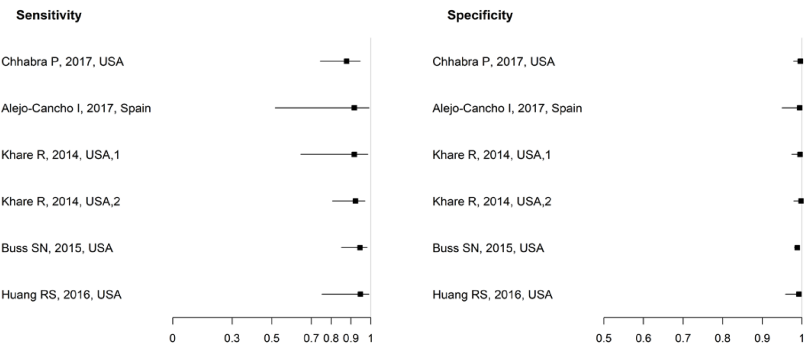

Rotavirus

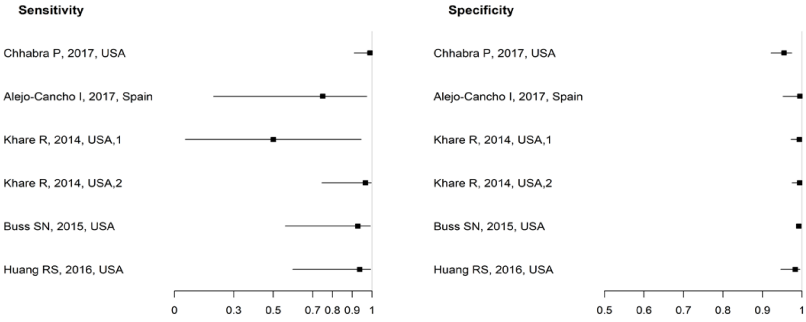

Sapovirus

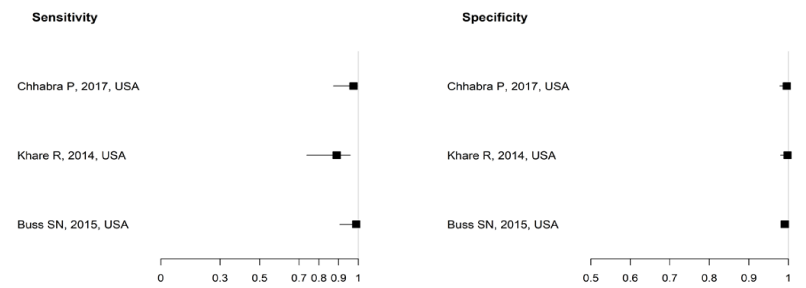

*Cryptosporidium*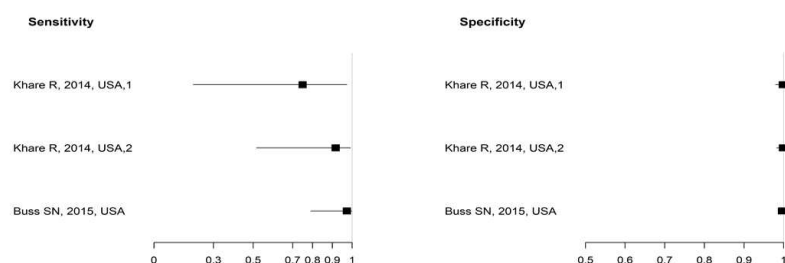*Giardia lamblia*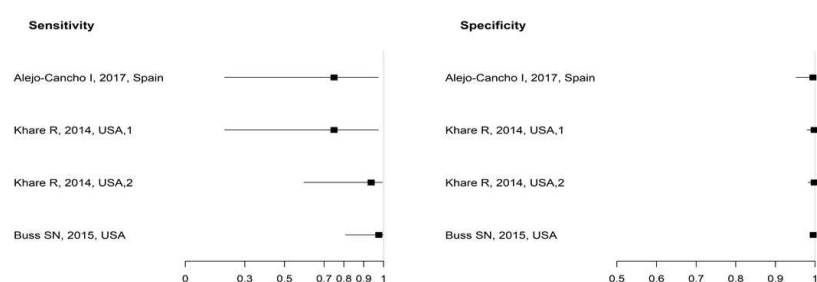

**Supplementary materials S8.** (A) Forest plot of the estimated sensitivity and specificity (black squares) of the Luminex xTAG GI panel for each pathogen, and its 95% confidence intervals (horizontal black lines) of each study. (B) Forest plot of the estimated sensitivity and specificity (black squares) of the FilmArray GI panel for each pathogen, and its 95% confidence intervals (horizontal black lines) of each study.



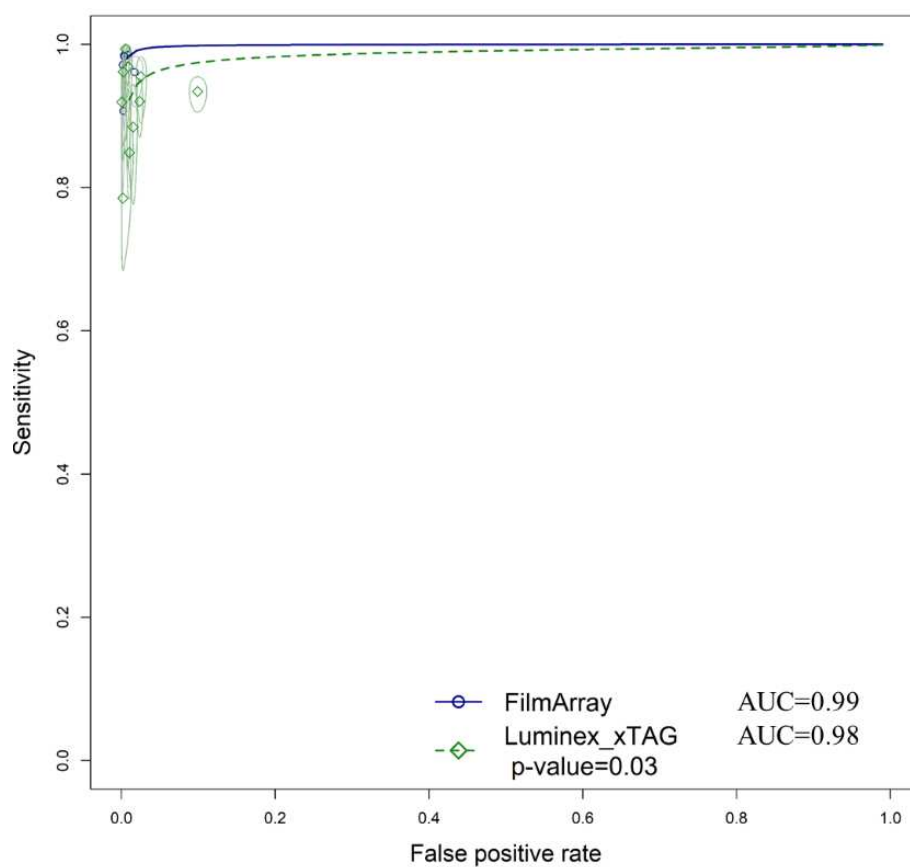

**Supplementary materials S9.** Summary receiver operating characteristic (SROC) curve. Dots and diamonds represent estimates of individual studies for FilmArray and Luminex, respectively. Circles represent the 95% confidence interval. SROC curves are the lines passing through summary points.

**Supplementary material S10.** Subgroup analysis for GI panel sensitivity and specificity when tested with different gold standards.

| Test                                       | Studies number | Sensitivity (95% confidence interval) | Specificity (95% confidence interval) | AUC (95% confidence interval) | P value (compared with overall data) |
|--------------------------------------------|----------------|---------------------------------------|---------------------------------------|-------------------------------|--------------------------------------|
| <b>Campylobacter</b>                       |                |                                       |                                       |                               |                                      |
| Culture                                    | 4              | 0.96(0.89-0.98)                       | 0.96(0.93-0.97)                       | 0.99(0.96-1.00)               | 0.901                                |
| PCR/sequencing                             | 2              | NA                                    | NA                                    | NA                            | NA                                   |
| Culture and PCR/sequencing                 | 5              | 0.84(0.73-0.92)                       | 1.00(0.99-1.00)                       | 0.99(0.97-1.00)               | 0.631                                |
| Overall(Culture or PCR/sequencing)         | 11             | 0.92(0.86-0.96)                       | 0.98(0.95-0.99)                       | 0.99(0.98-1.00)               | ref                                  |
| <b>Shigella</b>                            |                |                                       |                                       |                               |                                      |
| Culture                                    | 4              | 0.95(0.72-0.99)                       | 0.98(0.91-1.00)                       | 0.99(0.95-1.00)               | 0.942                                |
| PCR/sequencing                             | 2              | NA                                    | NA                                    | NA                            | NA                                   |
| Culture and PCR/sequencing                 | 5              | 0.92(0.75-0.98)                       | 0.99(0.99-1.00)                       | 1.00(0.98-1.00)               | 0.865                                |
| Overall(Culture or PCR/sequencing)         | 11             | 0.95(0.88-0.98)                       | 0.99(0.97-0.99)                       | 1.00(0.99-1.00)               | ref                                  |
| <b>Rotavirus A</b>                         |                |                                       |                                       |                               |                                      |
| Virus antigen detection                    | 5              | 0.93(0.80-0.98)                       | 0.98(0.96-0.99)                       | 0.99(0.94-1.00)               | 0.956                                |
| PCR/sequencing                             | 4              | 0.93(0.88-0.96)                       | 0.99(0.96-0.99)                       | 0.99(0.98-1.00)               | 0.550                                |
| Virus antigen detection and PCR/sequencing | 2              | NA                                    | NA                                    | NA                            | NA                                   |

|                                                     |    |                 |                 |                 |     |
|-----------------------------------------------------|----|-----------------|-----------------|-----------------|-----|
| Overall (Virus antigen detection or PCR/sequencing) | 11 | 0.93(0.90-0.96) | 0.99(0.98-1.00) | 0.99(0.99-1.00) | ref |
|-----------------------------------------------------|----|-----------------|-----------------|-----------------|-----|
